# Supplementary material for: Deciphering C–H⋯O/X weak hydrogen bonding and halogen bonding interactions in aromatic peptoids
Source: Royal Society of Chemistry journal article supplement (doi:10.1039/d2nj02616c), 2022-01-01
Supplement: d2nj02616c1.pdf [file d2nj02616c1.pdf]

*Supporting Information*

**Supporting Information**

**Deciphering C-H $\cdots$ O/X Weak Hydrogen Bonding  
and Halogen Bonding Interactions in Aromatic  
Peptoids**

Manasa Purushotham<sup>†</sup>, Bishwajit Paul<sup>†,\*</sup>, Siva Nageswara Rao Gajula<sup>°</sup>, Biswajit Sahariah<sup>^,\*</sup>,  
Rajesh Sonti<sup>°</sup>,

[<sup>†</sup>] Department of Chemistry, Jnana Bharathi Campus, Bangalore University, Bangalore-560056, India.

[<sup>°</sup>] Department of Pharmaceutical Analysis, National Institute of Pharmaceutical Education and Research,  
Hyderabad, Telangana-500037, India

[<sup>^</sup>] New Chemistry Unit, Jawaharlal Nehru Centre for Advanced Scientific Research, Jakkur,  
Bangalore-560064, India

Email: [bishu.nyu@gmail.com](mailto:bishu.nyu@gmail.com); [biswajit@jncasr.ac.in](mailto:biswajit@jncasr.ac.in)

**Table of Contents**

|                                                                                                                                           |    |
|-------------------------------------------------------------------------------------------------------------------------------------------|----|
| <b>1. Materials and Experiment Methods</b> .....                                                                                          | 2  |
| <b>2. Chemical Structures</b> .....                                                                                                       | 3  |
| <b>3. Scheme 2. General Synthetic scheme and protocol for peptoid model systems</b> .....                                                 | 4  |
| <b>4. Characterization Data</b> .....                                                                                                     | 7  |
| <b>5. Nuclear Magnetic Resonance (NMR) Spectra</b> .....                                                                                  | 8  |
| <b>6. HPLC Data</b> .....                                                                                                                 | 34 |
| <b>7. Crystallographic Data</b> .....                                                                                                     | 37 |
| <b>8. Computational Details</b> .....                                                                                                     | 49 |
| <b>9. Optimized Cartesian coordinates, number of imaginary frequencies and total energy (E in a.u.) of the optimised structures</b> ..... | 51 |
| <b>10. References</b> .....                                                                                                               | 57 |

## **1. Materials and Experiment Methods**

**General Experimental:** All starting material and reagents were brought from a commercial source (Alfa-Aesar, Sigma-Aldrich, Fisher Scientific, and TCI) and used without further purification. Dichloromethane and THF solvents were purchased from commercial sources (Spectrochem, Rankem) and used without further distillation. The reaction was monitored by thin-layer chromatography (TLC) experiments were done using (Merck Silica gel 60, F254) aluminum sheets and the chromatogram was accompanied by UV visualization. Flash chromatography was performed using silica gel 60 Å, mesh size 40-63 microns (230-400 mesh) from Sisco research laboratories Pvt. Ltd (SRL).

**Instrumentation:** NMR (<sup>1</sup>H NMR) spectra and carbon nuclear magnetic resonance (<sup>13</sup>C NMR) spectra were recorded in CDCl<sub>3</sub> using Bruker AMX-400 (400 MHz) spectrometer. Sample preparation: 10 mg of sample dissolved in CDCl<sub>3</sub> to make ~800 µl of total volume for NMR. Liquid chromatography coupled to mass spectrometry (LC-MS) analysis was carried out using the Agilent 1200 series LC system (Agilent Technologies, Santa Clara, California, USA), hyphenated to quadrupole time of flight (Q-TOF) mass spectrometer (6540 series, Agilent Technologies). The study was carried out in positive mode under electrospray ionization (ESI). The typical operating source conditions for MS scan were set as the fragmentor voltage was set at 175 V, the capillary at 4000 V, the skimmer at 65 V, and nitrogen was used as the drying (325 °C, 12 L/min) and nebulizing gas (40 psi). All the spectra were recorded under identical experimental conditions. Before analysis, internal calibration was carried out using an ESI-L tuning mix (Agilent Technologies). Then, the data were acquired and evaluated using Mass Hunter Workstation software.

NMR experiments were carried out on Bruker Avance 500 MHz spectrometer. NMR spectra were recorded for the peptoids at a concentration of ~6 mM at 300 K temperature in CDCl<sub>3</sub>, DMSO-D<sub>6</sub>, CD<sub>3</sub>CN and CD<sub>3</sub>OD solutions to determine the cis/trans equilibrium constant and Gibbs free energy. For the determination of the thermodynamic parameters for cis/trans equilibrium about

## Supporting Information

tertiary amide linkages in the peptoid backbone, conformer populations were determined as a function of temperature over the range 260 K-300 K in acetonitrile and 300 K-340 K in DMSO-D6 solutions at 10 K intervals and determined the population of *cis* and *trans* forms in both the solvents at each temperature.

A chromatographic run was performed on Agilent Zorbax Eclipse plus C18 (4.6 mm × 250 mm, 5 μm) column. The mobile phase components water and acetonitrile were used in the linear gradient elution method of 20% acetonitrile to 100% acetonitrile in 30 mins followed by 15 min of equilibration. The flow rate was set at 1 mL/min, and the column temperature was 10 ± 2 °C. Autosampler temperature and injection volume were set as 5 ± 2 °C and 2 μL, respectively. The samples were identified at 230 nm using Waters HPLC System (Model: e2695 Separations Module with 2998 PDA Detector, Milford, Massachusetts, United States).

## 2. Chemical Structures

**Scheme 1.** Structure of ortho-substituted peptoid dimers

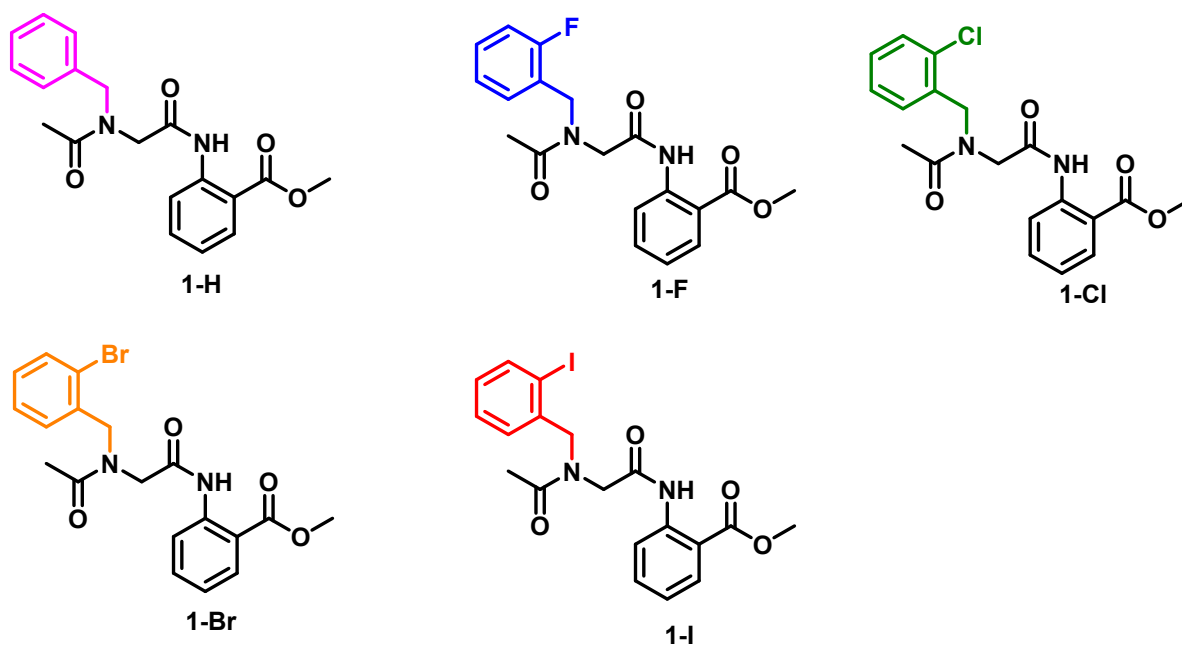

## 3. Scheme 2. General Synthetic scheme and protocol for peptoid model systems

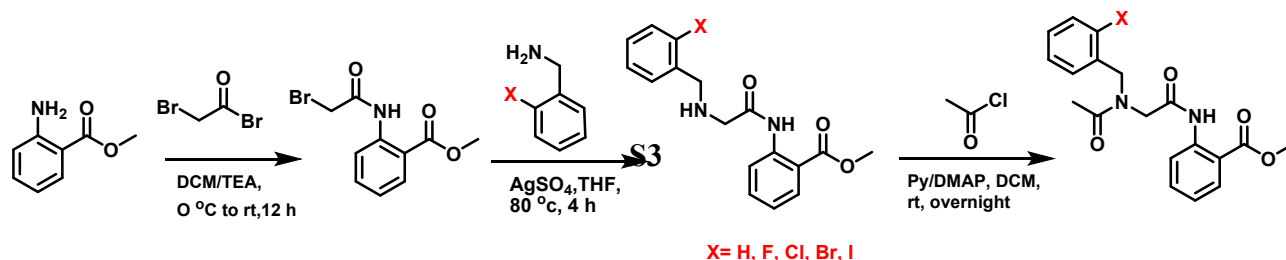

## *Supporting Information*

### **Synthetic steps:**

**a). Bromo acetylation step.** Methyl anthranilate (5 g, 33.0 mmol) has been dissolved in DCM followed by the addition of triethylamine (4.66 mL, 33.0 mmol) under nitrogen at 0 °C. The mixture was stirred at 0 °C for 15 min then added bromoacetyl bromide (4.66 mL, 52.9 mmol) dropwise over 10 min. The reaction mixture changed from the colourless suspension immediately turned yellow-orange solution and the reaction was left at room temperature overnight. The solvent was evaporated under reduced pressure. The resulting crude oil has been purified by column chromatography. The gradient of the solvent was (100% hexane to 90/10 hexane/EtOAc) to yield the desired compound as a white crystalline solid (7.9 g, 88 %).

**b). Displacement step:** To a solution of N-(2-phenyl)bromoacetamide (1 g, 3.676 mmol) was treated with an ortho-substituted benzylamine (4.044 mmol) in THF followed by the addition of AgSO<sub>4</sub> (11.029 mmol). The reaction was allowed for reflux at 80 °C for 4 h. The solvent was removed under reduced pressure. The crude mixture was then subjected to silica gel column chromatography in an n-hexane/ EtOAc solvent in which the gradient of the solvent was from (100% hexane to 85/15 hexane/EtOAc), depending upon the polarity of the compounds. The desired compounds were isolated yield **1-H** (0.94 g, 87 %), **1-F** (1.01 g, 87 %), **1-Cl** (1.08 g, 88 %), **1-Br** (1.22 g, 88 %) and **1-I** (1.34 g, 86 %).

**c). Acetylation step:** The next step was acetylation of N-termini of peptoids (1 mmol) by reacting with acetyl chloride with pyridine (1.2 mmol) followed by a catalytic amount of DMAP (~0.5 mg) in DCM. The acetyl chloride (2.5 mmol) was then added dropwise over 10 min. The reaction mixture was allowed to stir overnight at room temperature. The solvent was removed under reduced pressure to afford a crude compound, which was purified by column chromatography to yield the desired compound.

**Synthesis of 1-H:** The title compound has been prepared from methyl 2-(2-(N-benzylacetamido)acetamido)benzoate (0.5 g, 1.67 mmol) effected using the general procedure as

## Supporting Information

mentioned above for the preparation of **1-H** and purification was conducted *via* column chromatography (SiO<sub>2</sub>; 100% hexane to 60/40 hexane/EtOAc) to yield **1-H**, as a colourless solid, (0.38 g, 67 %).

**<sup>1</sup>H NMR (400 MHz, CDCl<sub>3</sub>):** δ 11.53 (1H, s, NH), 8.77 (1H, dd, *J* = 8.0 Hz, NH-Ar-*H*), 8.08 (1H, dd, *J* = 4.0 Hz, 8.0 Hz, NH-Ar-*H*), 7.61-7.56 (1H, m, NH-Ar-*H*), 7.42 (2H, t, *J* = 8.0 Hz, N-Ar-*H*), 7.34 (2H, dd, *J* = 4.0 Hz, 12.0 Hz, N-Ar-*H*), 7.25 (1H, d, *J* = 8.0 Hz, NH-Ar-*H*), 7.21-7.12 (1H, m, N-Ar-*H*), 4.79 (2H, s, β-CH<sub>2</sub>), 4.27 (2H, s, α-CH<sub>2</sub>), 3.97 (3H, s, OCH<sub>3</sub>), 2.40 (3H, s, CH<sub>3</sub>); **<sup>13</sup>C NMR (100 MHz, CDCl<sub>3</sub>):** 171.11, 167.70, 166.55, 139.96, 134.79, 133.69, 129.81, 128.07, 126.93, 125.50, 121.80, 119.24, 114.23, 52.12, 51.29, 49.38, 20.37; **HRMS:** *m/z* Calculated for [M+H]<sup>+</sup>. [C<sub>19</sub>H<sub>20</sub>N<sub>2</sub>O<sub>4</sub>+ H]<sup>+</sup> = 341.1496 Found = 341.1495.

**Synthesis of 1-F:** The title compound has been prepared from methyl 2-(2-(N-(2-fluorobenzyl)acetamido)acetamido)benzoate (0.5 g, 1.58 mmol) effected using the general procedure as mentioned above for the preparation of **1-F** and purification was conducted *via* column chromatography (SiO<sub>2</sub>; 100% hexane to 60/40 hexane/EtOAc) to yield **1-F**, as a colourless solid, (0.37 g, 68 %).

**<sup>1</sup>H NMR (400 MHz, CDCl<sub>3</sub>):** δ 11.53 (1H, s, NH), 8.75 (1H, d, *J* = 8.0 Hz, NH-Ar-*H*), 8.07 (1H, dd, *J* = 4.0 Hz, 8.0 Hz, NH-Ar-*H*), 7.62-7.55 (1H, m, NH-Ar-*H*), 7.46-7.32 (1H, m, N-Ar-*H*), 7.28-7.18 (2H, m, NH-Ar-*H*, N-Ar-*H*), 7.15-7.02 (2H, m, N-Ar-*H*), 4.81 (2H, s, β-CH<sub>2</sub>), 4.26 (2H, s, α-CH<sub>2</sub>), 3.97 (3H, s, OCH<sub>3</sub>), 2.41 (3H, s, CH<sub>3</sub>); **<sup>13</sup>C NMR (100 MHz, CDCl<sub>3</sub>):** 171.05, 167.68, 166.39, 161.02, 139.91, 133.67, 129.80, 128.87, 128.79, 127.42, 127.38, 123.58, 121.81, 119.23, 114.92, 51.31, 49.25, 46.53, 20.26; **HRMS:** *m/z* Calculated for [M+H]<sup>+</sup>. [C<sub>19</sub>H<sub>19</sub>FN<sub>2</sub>O<sub>4</sub>+ H]<sup>+</sup> = 359.1402 Found = 359.1400.

**Synthesis of 1-Cl:** The title compound has been prepared from methyl 2-(2-(N-(2-chlorobenzyl)acetamido)acetamido)benzoate (0.5 g, 1.50 mmol) effected using the general procedure as mentioned above for the preparation of **1-Cl** and purification was conducted *via* column chromatography (SiO<sub>2</sub>; 100% hexane to 70/30 hexane/EtOAc) to yield **1-Cl**, as a colourless solid, (0.365 g, 65 %).

## Supporting Information

**<sup>1</sup>H NMR (400 MHz, CDCl<sub>3</sub>):** δ 11.58 (1H, s, NH), 8.77 (1H, d, *J* = 8.0 Hz, NH-Ar-*H*), 8.08 (1H, dd, *J* = 8.0 Hz, NH-Ar-*H*), 7.61-7.57 (1H, m, NH-Ar-*H*), 7.46 (1H, dd, *J* = 8.0 Hz, N-Ar-*H*), 7.39-7.32 (2H, m, N-Ar-*H*), 7.26-7.13 (2H, m, NH-Ar-*H*, N-Ar-*H*), 4.85 (2H, s, β-CH<sub>2</sub>), 4.28 (2H, s, α-CH<sub>2</sub>), 3.98 (3H, s, OCH<sub>3</sub>), 2.34 (3H, s, CH<sub>3</sub>); **<sup>13</sup>C NMR (100 MHz, CDCl<sub>3</sub>):** 171.36, 167.74, 166.27, 139.92, 133.70, 132.31, 129.82, 129.06, 128.58, 128.14, 126.43, 126.03, 121.86, 119.28, 114.30, 51.34, 50.14, 49.61, 20.24; **HRMS:** *m/z* Calculated for [M+H]<sup>+</sup>. [C<sub>19</sub>H<sub>19</sub>ClN<sub>2</sub>O<sub>4</sub>+ H]<sup>+</sup> = 375.1106 Found = 375.1103.

**Synthesis of 1-Br:** The title compound has been prepared from methyl 2-(2-(N-(2-bromobenzyl)acetamido)acetamido)benzoate (0.5 g, 1.32 mmol) effected using the general procedure as mentioned above for the preparation of **1-Br** and purification was conducted *via* column chromatography (SiO<sub>2</sub>; 100% hexane to 70/30 hexane/EtOAc) to yield **1-Br**, as a colourless solid, (0.368 g, 66 %).

**<sup>1</sup>H NMR (400 MHz, CDCl<sub>3</sub>):** δ 11.58 (1H, s, NH), 8.77 (1H, dd, *J* = 8.0 Hz, NH-Ar-*H*), 8.08 (1H, dd, *J* = 4.0 Hz, NH-Ar-*H*), 7.66-7.56 (2H, m, NH-Ar-*H*, N-Ar-*H*), 7.43-7.39 (1H, m, N-Ar-*H*), 7.27-7.23 (1H, m, N-Ar-*H*), 7.20-7.13 (2H, m, NH-Ar-*H*, N-Ar-*H*), 4.81 (2H, s, β-CH<sub>2</sub>), 4.28 (2H, s, α-CH<sub>2</sub>), 3.98 (3H, s, OCH<sub>3</sub>), 2.33 (3H, s, CH<sub>3</sub>); **<sup>13</sup>C NMR (100 MHz, CDCl<sub>3</sub>):** 171.38, 167.75, 166.24, 139.92, 133.70, 132.37, 129.82, 128.84, 128.39, 127.06, 126.04, 122.30, 121.86, 119.30, 114.32, 52.62, 51.34, 49.68, 20.24; **HRMS:** *m/z* Calculated for [M+H]<sup>+</sup>. [C<sub>19</sub>H<sub>19</sub>BrN<sub>2</sub>O<sub>4</sub>+ H]<sup>+</sup> = 419.0601 Found = 419.0597.

**Synthesis of 1-I:** The title compound has been prepared from methyl 2-(2-(N-(2-iodobenzyl)acetamido)acetamido)benzoate (0.5 g, 1.17 mmol) effected using the general procedure as mentioned above for the preparation of **1-I** and purification was conducted *via* column chromatography (SiO<sub>2</sub>; 100% hexane to 75/25 hexane/EtOAc) to yield **1-I**, as a colourless solid, (0.36 g, 65 %).

**<sup>1</sup>H NMR (400 MHz, CDCl<sub>3</sub>):** δ 11.58 (1H, s, NH), 8.77 (1H, dd, *J* = 8.0 Hz, NH-Ar-*H*), 8.09 (1H, dd, *J* = 8.0 Hz, NH-Ar-*H*), 7.93 (1H, dd, *J* = 8.0 Hz, N-Ar-*H*), 7.62-7.58 (1H, m, NH-Ar-*H*), 7.44 (1H, t, *J* = 8.0 Hz, N-Ar-*H*), 7.18-7.14 (2H, m, NH-Ar-*H*, N-Ar-*H*), 7.09 (1H, t, *J* = 8.0 Hz, N-Ar-*H*), 4.72 (2H, s, β-CH<sub>2</sub>), 4.28 (2H, s, α-CH<sub>2</sub>), 3.99 (3H, s, OCH<sub>3</sub>), 2.32 (3H, s, CH<sub>3</sub>); **<sup>13</sup>C**

### Supporting Information

**NMR (100 MHz, CDCl<sub>3</sub>):** 171.39, 167.76, 166.21, 139.92, 139.07, 136.57, 133.71, 129.82, 128.59, 127.91, 125.61, 121.88, 119.35, 114.35, 96.61, 57.55, 51.37, 49.75, 20.30; **HRMS:** m/z Calculated for [M+H]<sup>+</sup>. [C<sub>19</sub>H<sub>19</sub>IN<sub>2</sub>O<sub>4</sub>+ H]<sup>+</sup> = 467.0462 Found = 467.0455.

#### 4. Characterization Data

**Table S1.** Characterization of N-benzyl Peptoid dimers by LC-HRMS

| <b>N-benzyl Peptoid dimers</b> | <b>Theoretical mass (M+H)<sup>+</sup></b> | <b>Observed mass (M+H)<sup>+</sup></b> | <b>Mass Error (in ppm)</b> |
|--------------------------------|-------------------------------------------|----------------------------------------|----------------------------|
| 1-H                            | 341.1496                                  | 341.1495                               | -0.293127                  |
| 1-F                            | 359.1402                                  | 359.1400                               | -0.556886                  |
| 1-Cl                           | 375.1106                                  | 375.1103                               | -0.799764                  |
| 1-Br                           | 419.0601                                  | 419.0597                               | -0.954517                  |
| 1-I                            | 467.0462                                  | 467.0455                               | -1.498781                  |

## 5. Nuclear Magnetic Resonance (NMR) Spectra

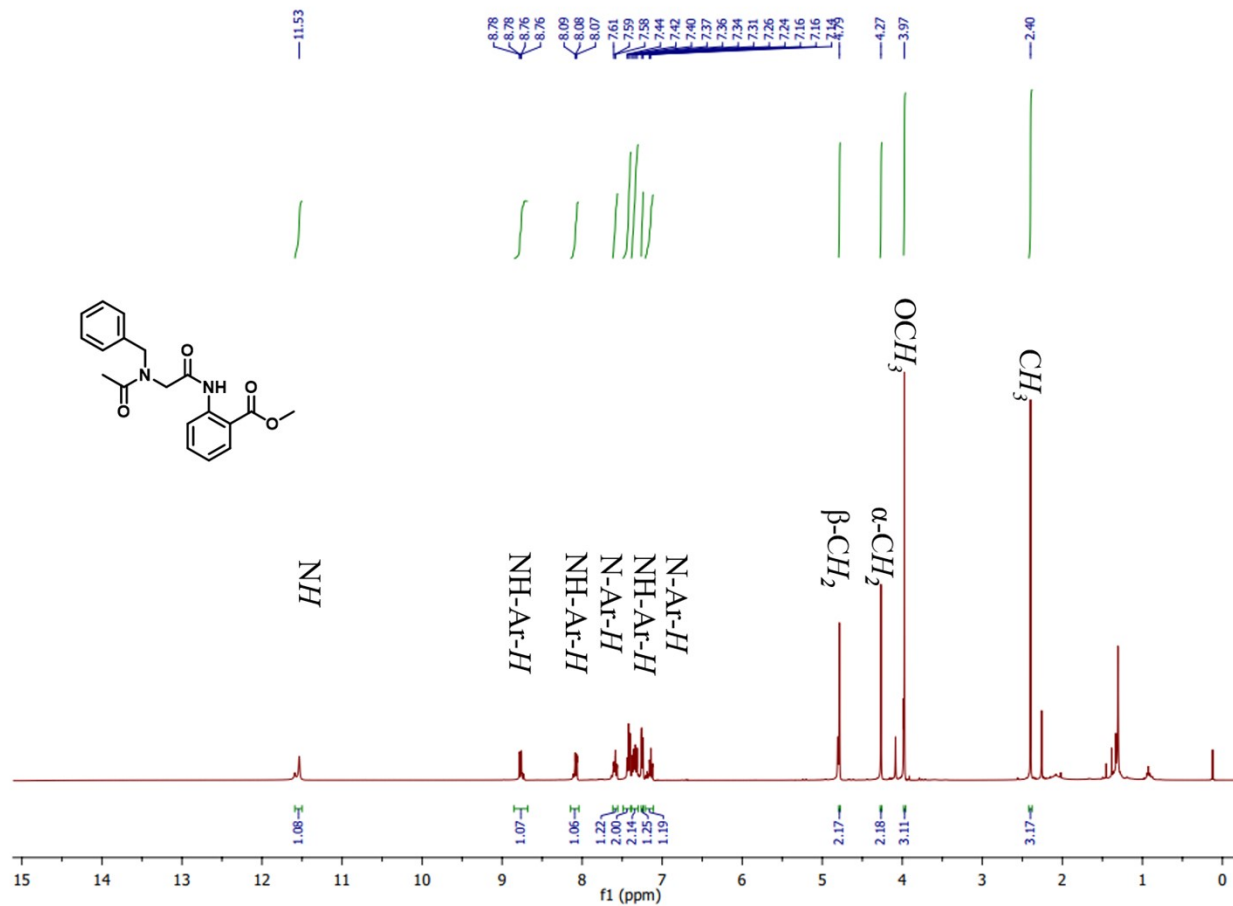

Figure S1. <sup>1</sup>H-NMR Spectra of Peptoid **1-H** in CDCl<sub>3</sub>.



Supporting Information

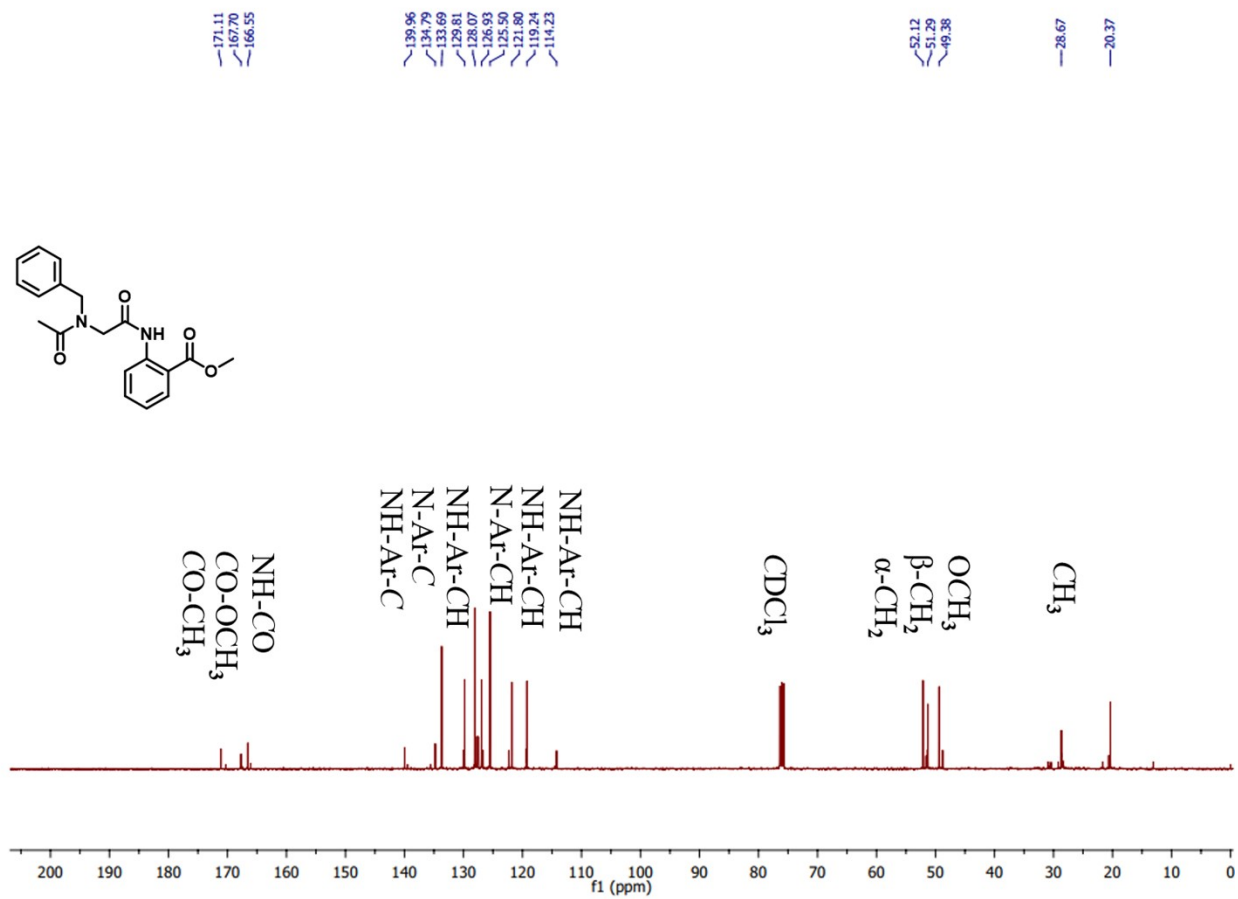

Figure S2. <sup>13</sup>C-NMR Spectra of Peptoid 1-H in CDCl<sub>3</sub>.

*Supporting Information*

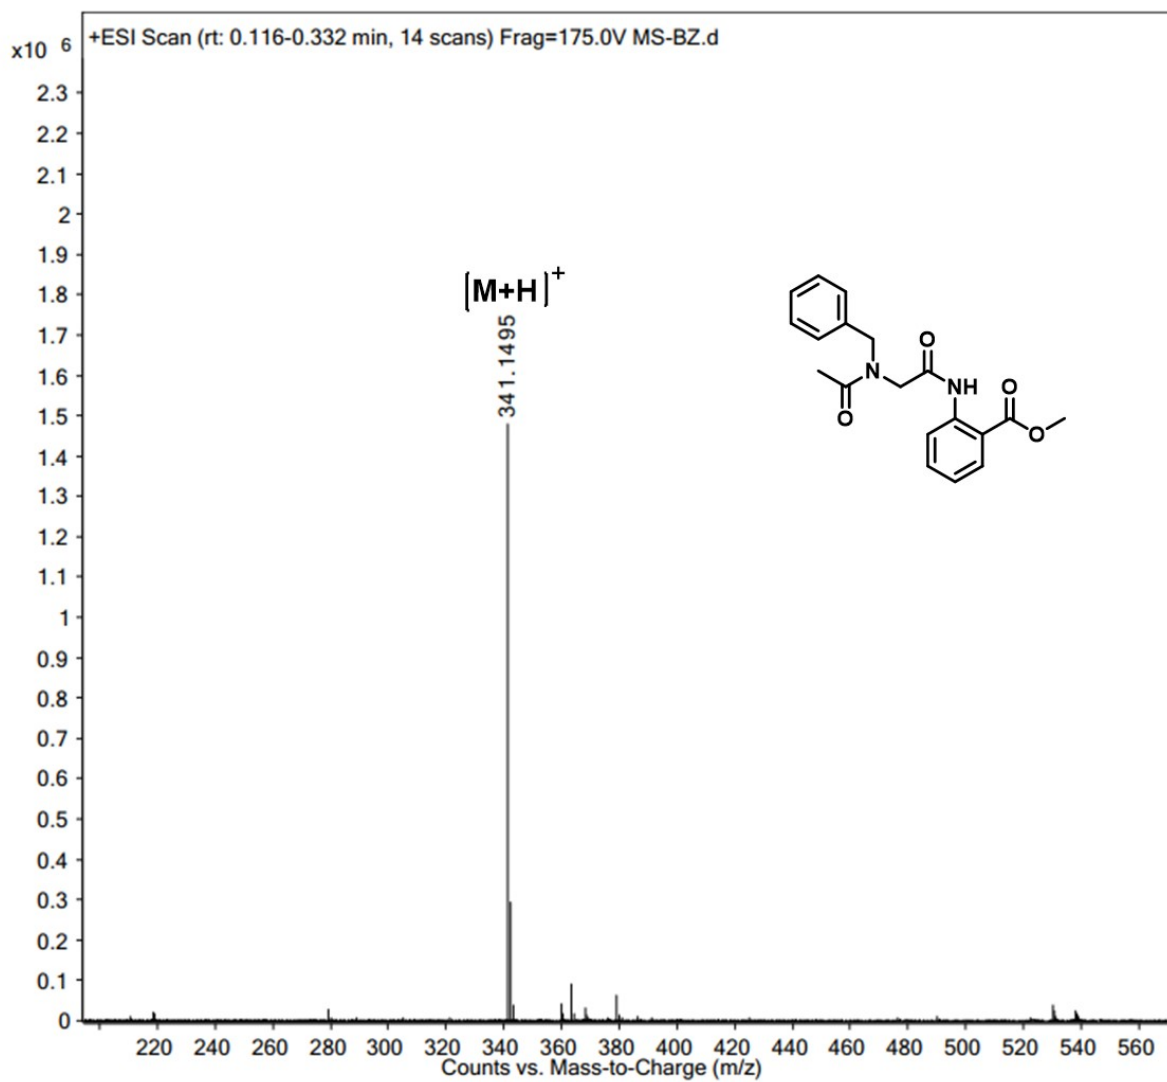

**Figure S3.** Mass spectra of peptoid 1-H.

Supporting Information

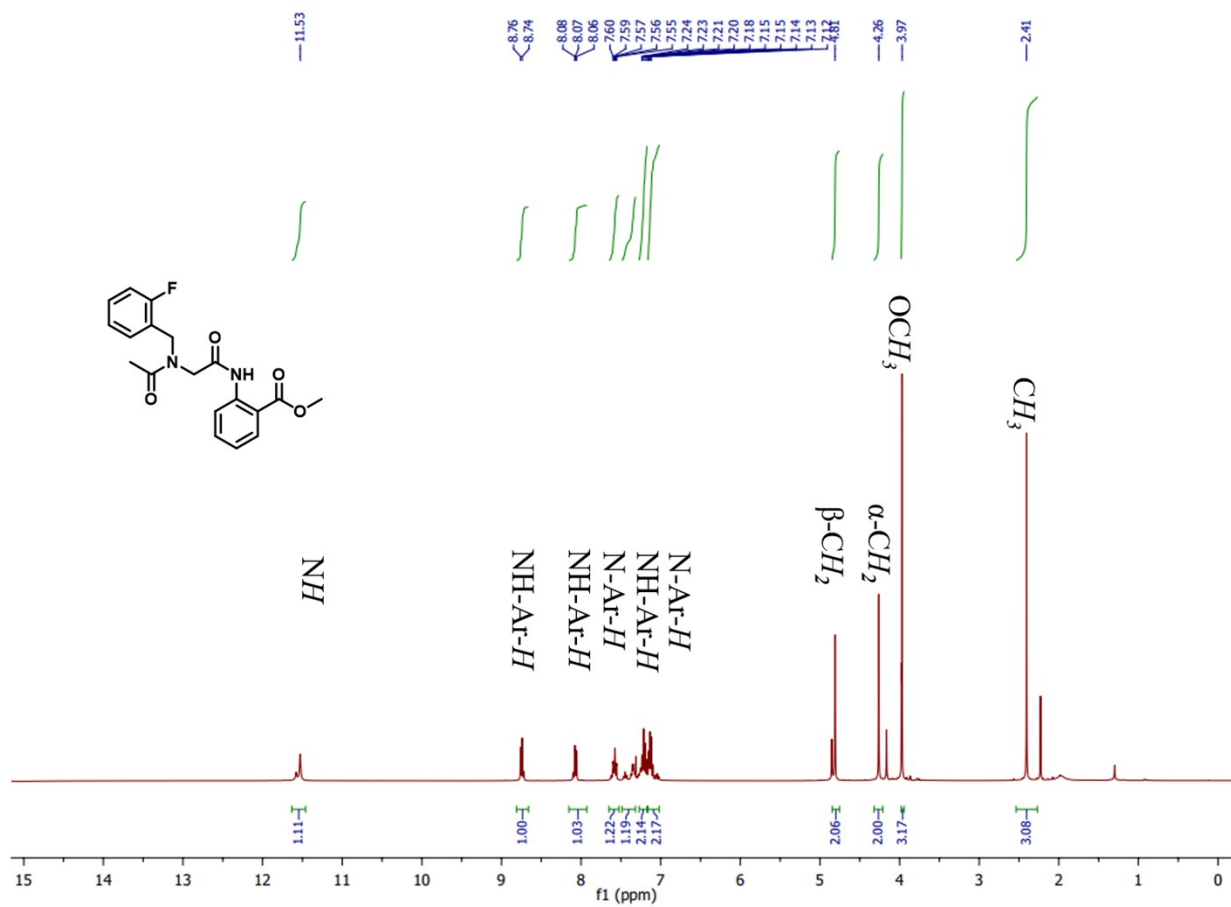

Figure S4. <sup>1</sup>H-NMR Spectra of Peptoid 1-F in CDCl<sub>3</sub>.

Supporting Information

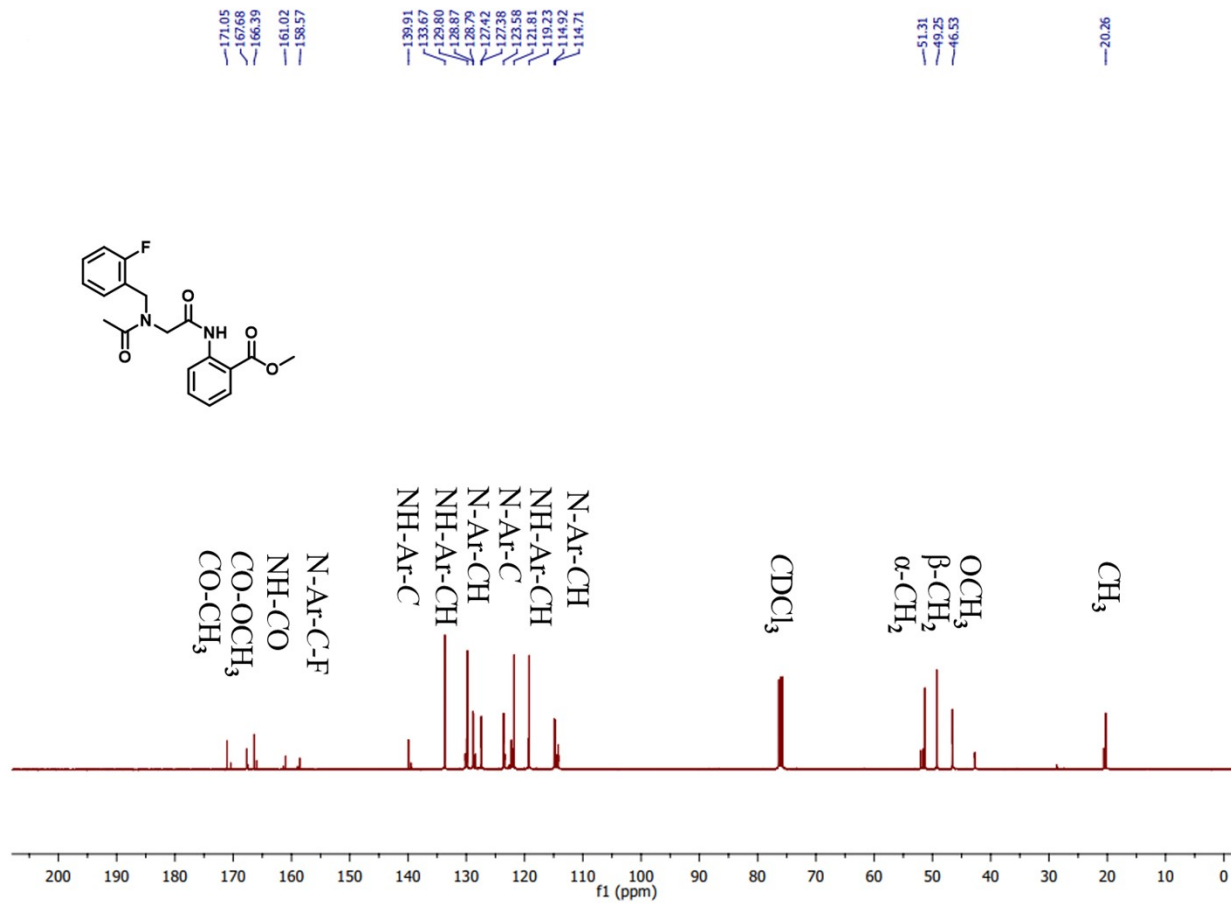

Figure S5. <sup>13</sup>C-NMR Spectra of Peptoid 1-F in CDCl<sub>3</sub>.

*Supporting Information*

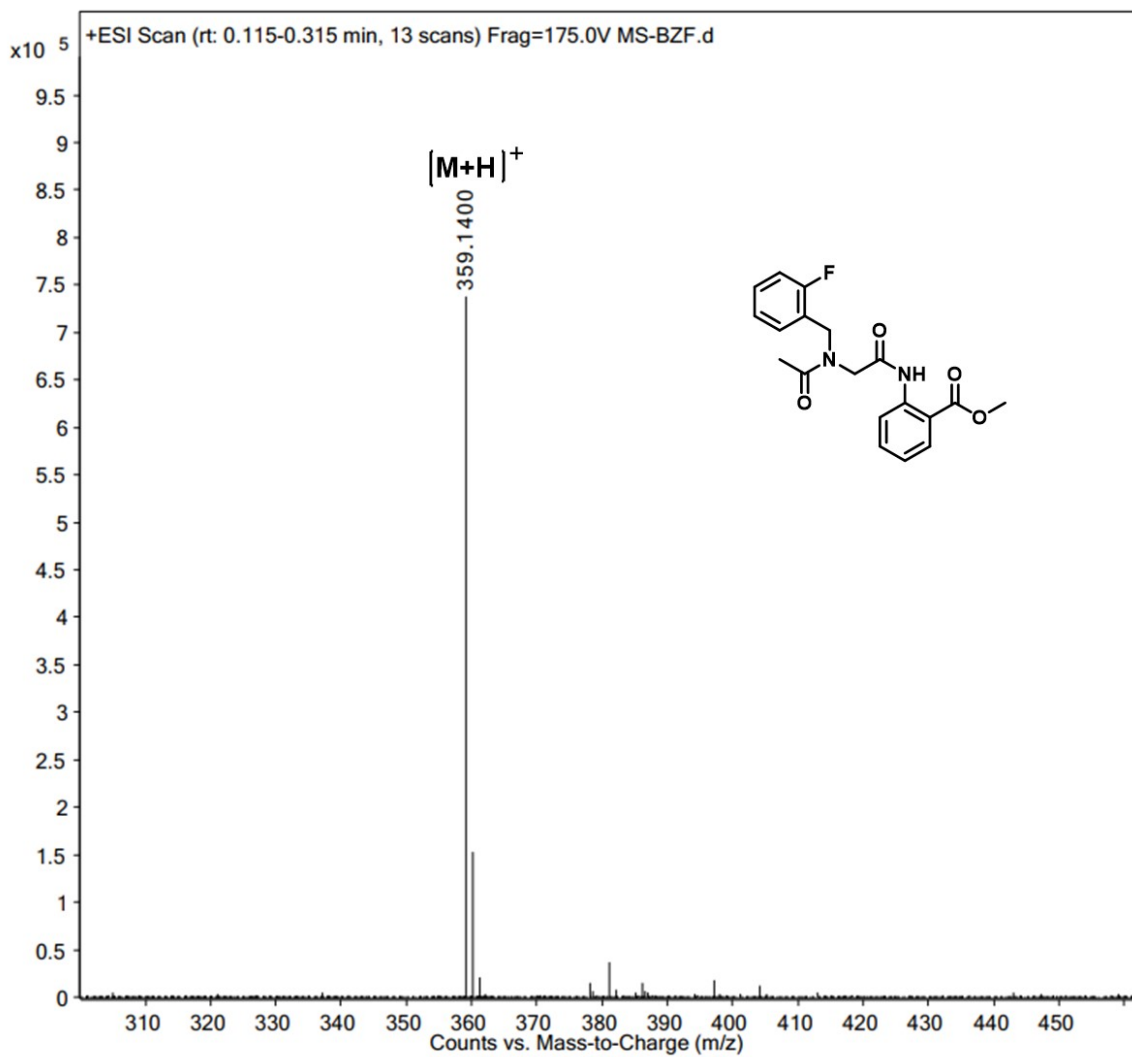

**Figure S6.** Mass spectra of peptoid 1-F.

Supporting Information

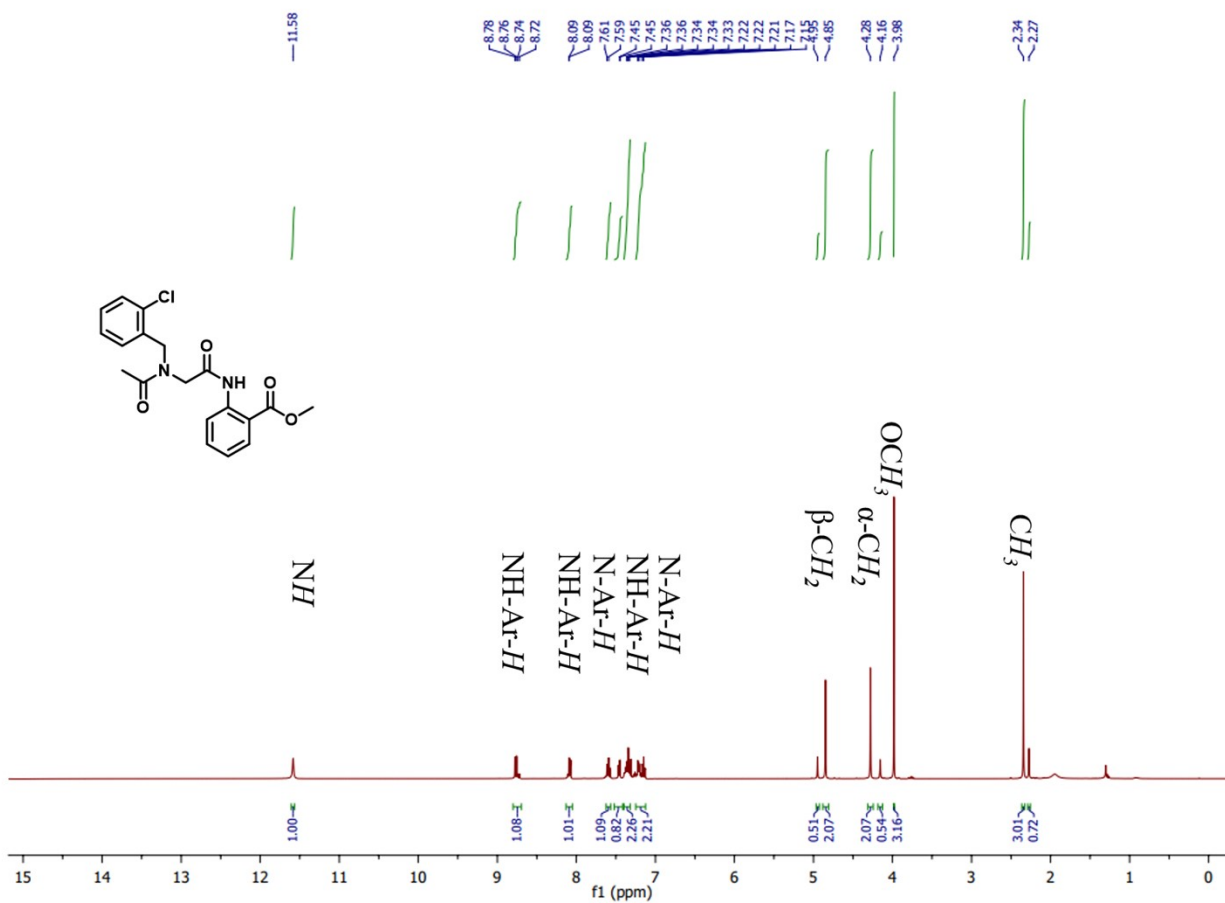

Figure S7. <sup>1</sup>H-NMR Spectra of Peptoid 1-Cl in CDCl<sub>3</sub>.

Supporting Information

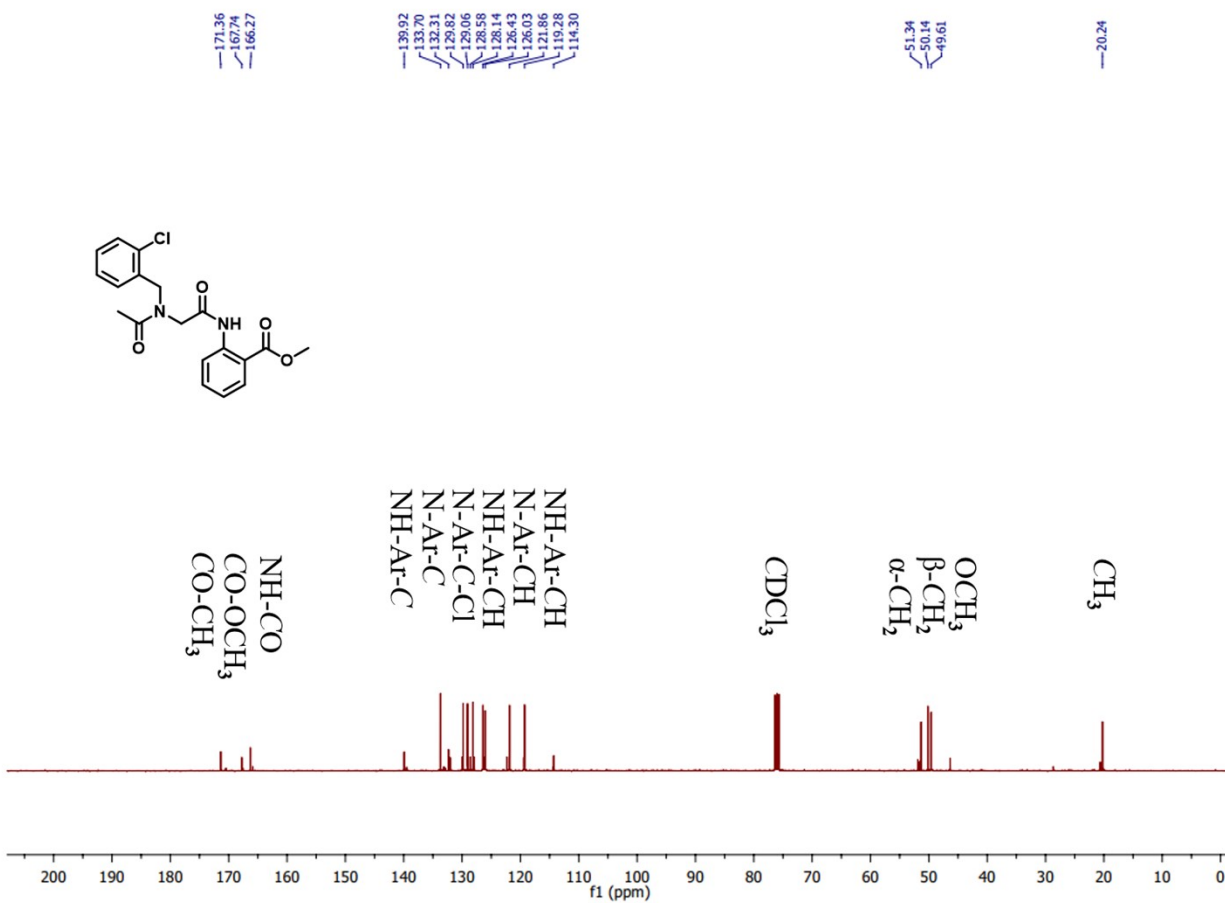

Figure S8. <sup>13</sup>C-NMR Spectra of Peptoid 1-Cl in CDCl<sub>3</sub>.

Supporting Information

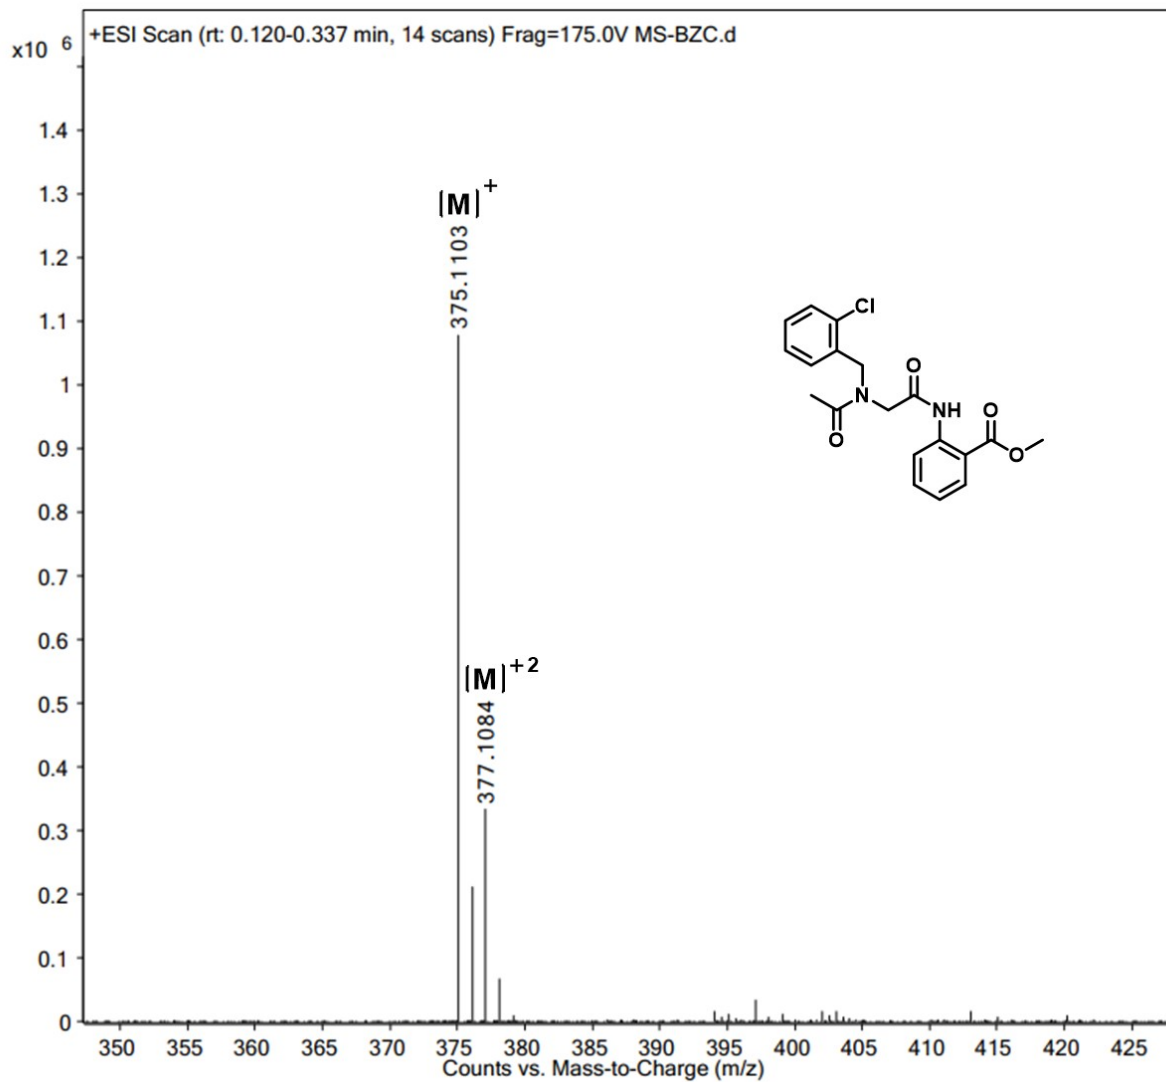

Figure S9. Mass spectra of peptoid 1-Cl.



Supporting Information

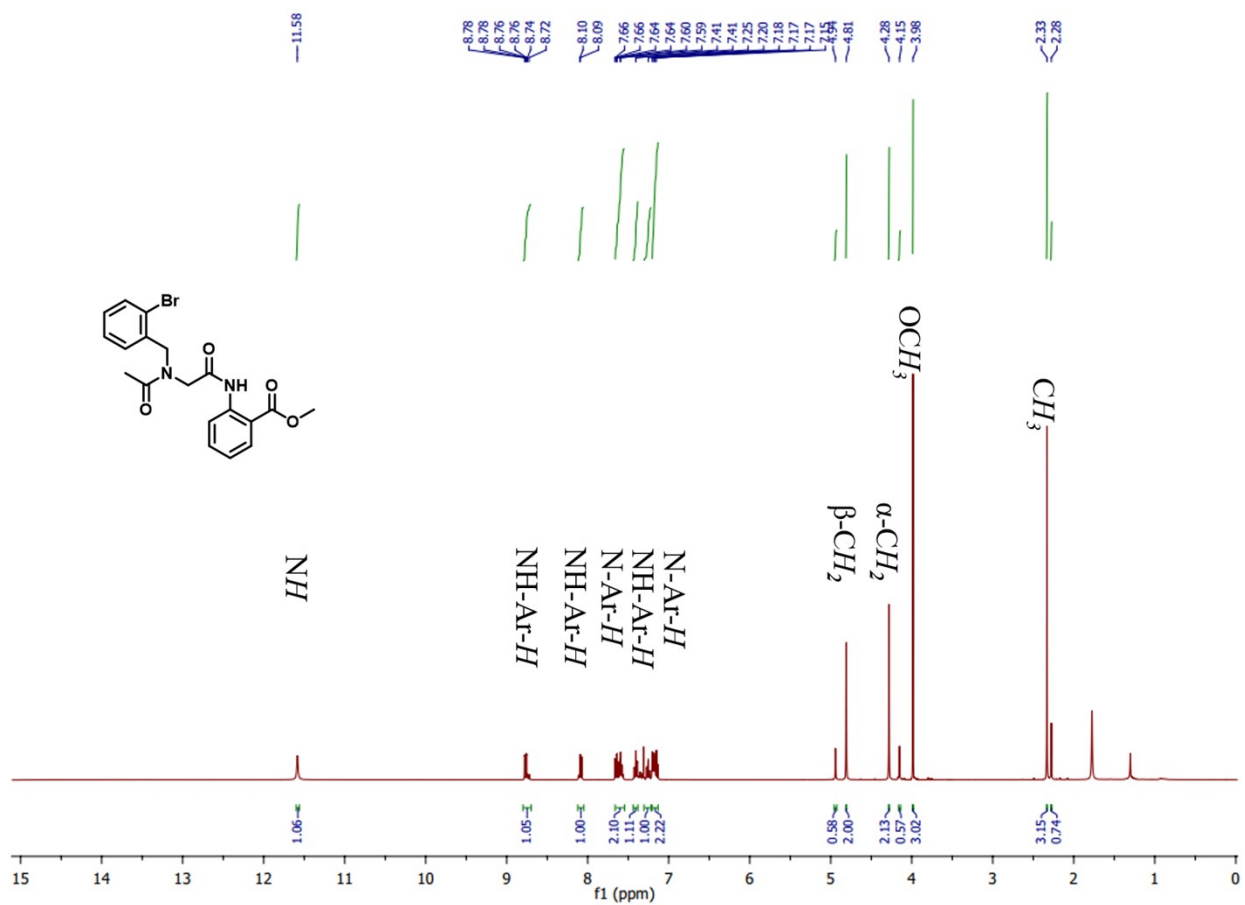

Figure S10. <sup>1</sup>H-NMR Spectra of Peptoid 1-Br in CDCl<sub>3</sub>.

Supporting Information

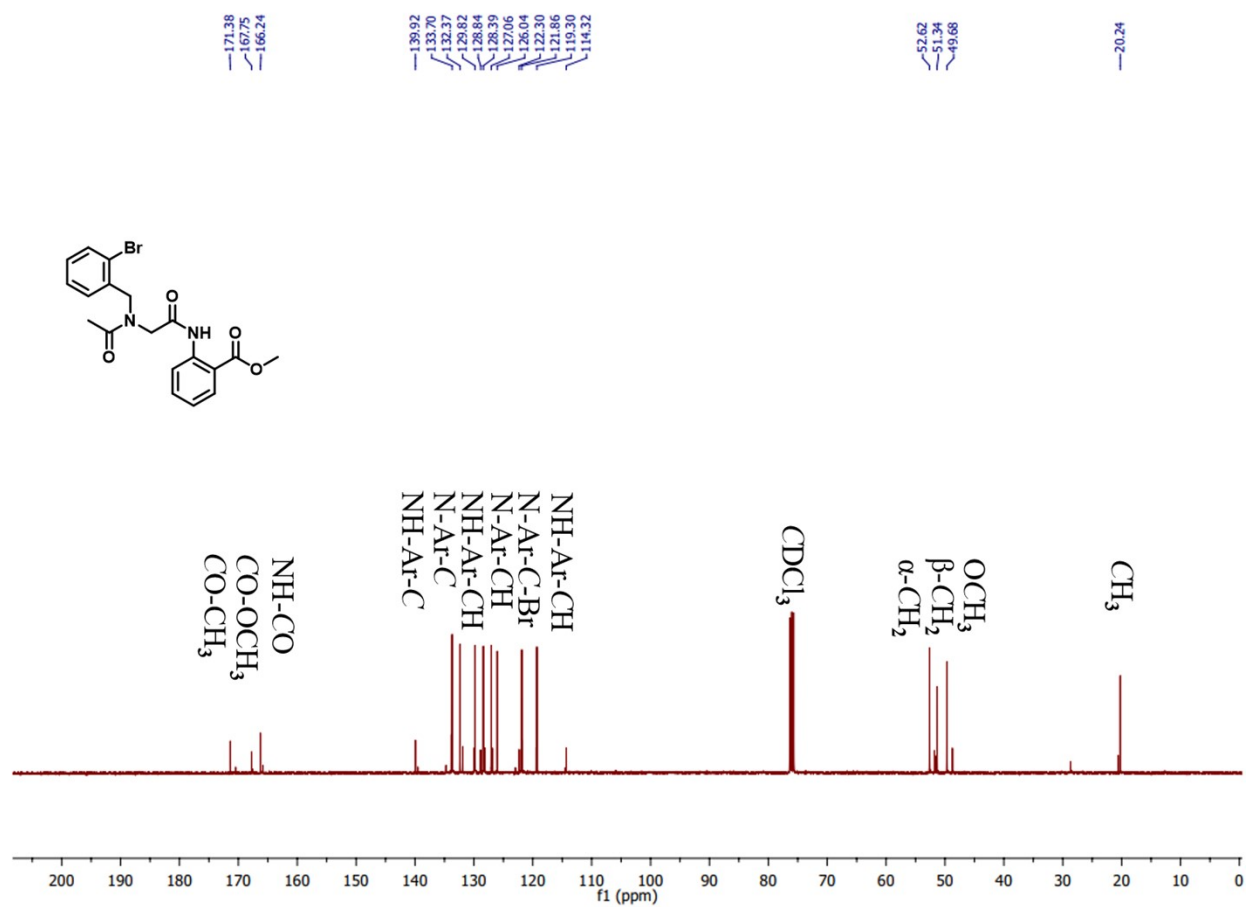

Figure S11. <sup>13</sup>C-NMR Spectra of Peptoid 1-Br in CDCl<sub>3</sub>.

Supporting Information

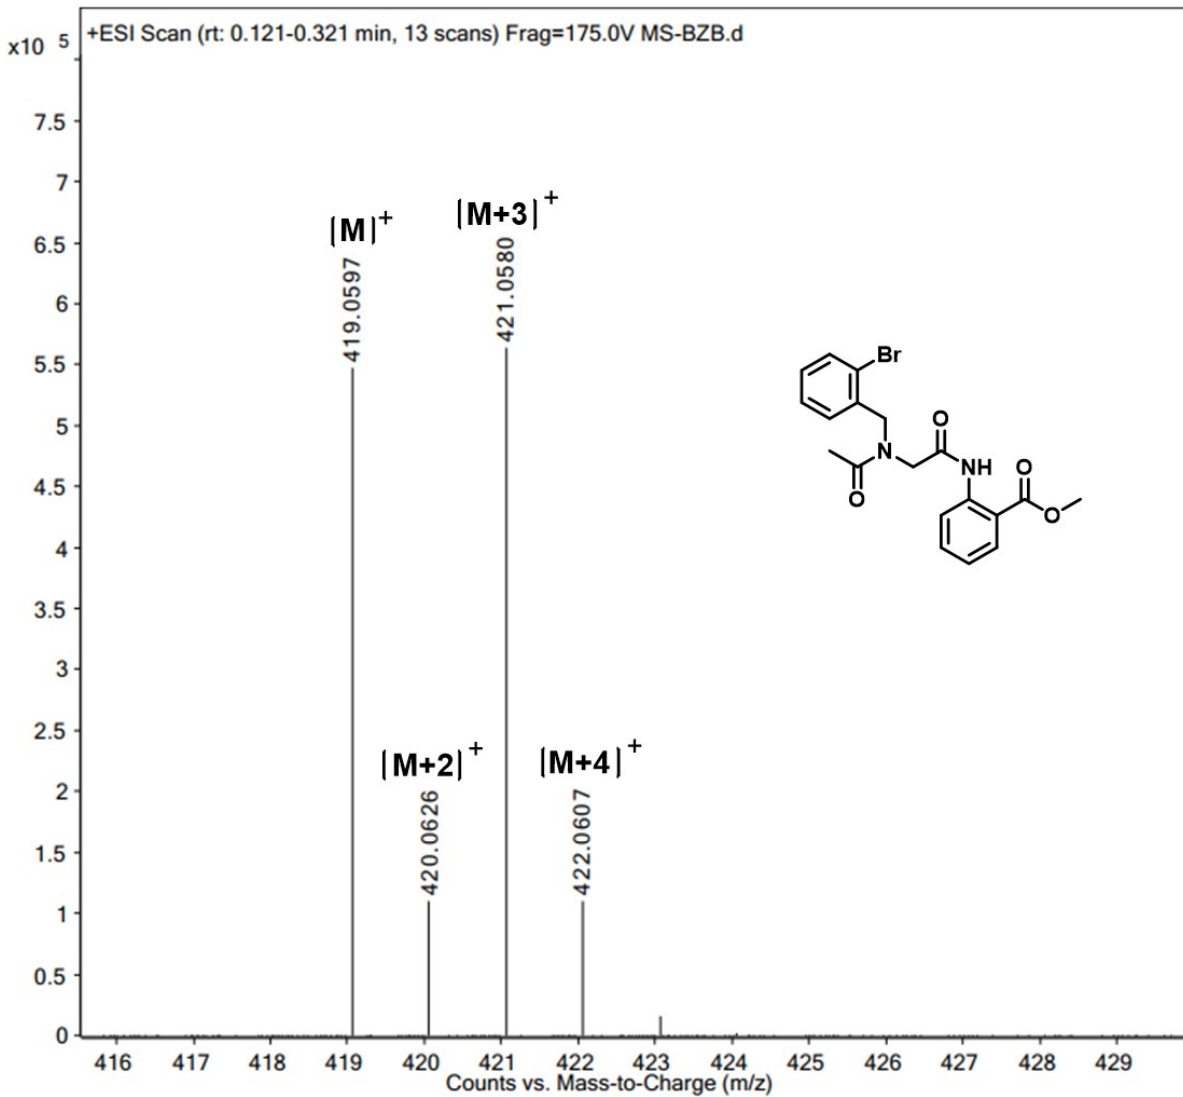

Figure S12. Mass spectra of peptoid 1-Br.

Supporting Information

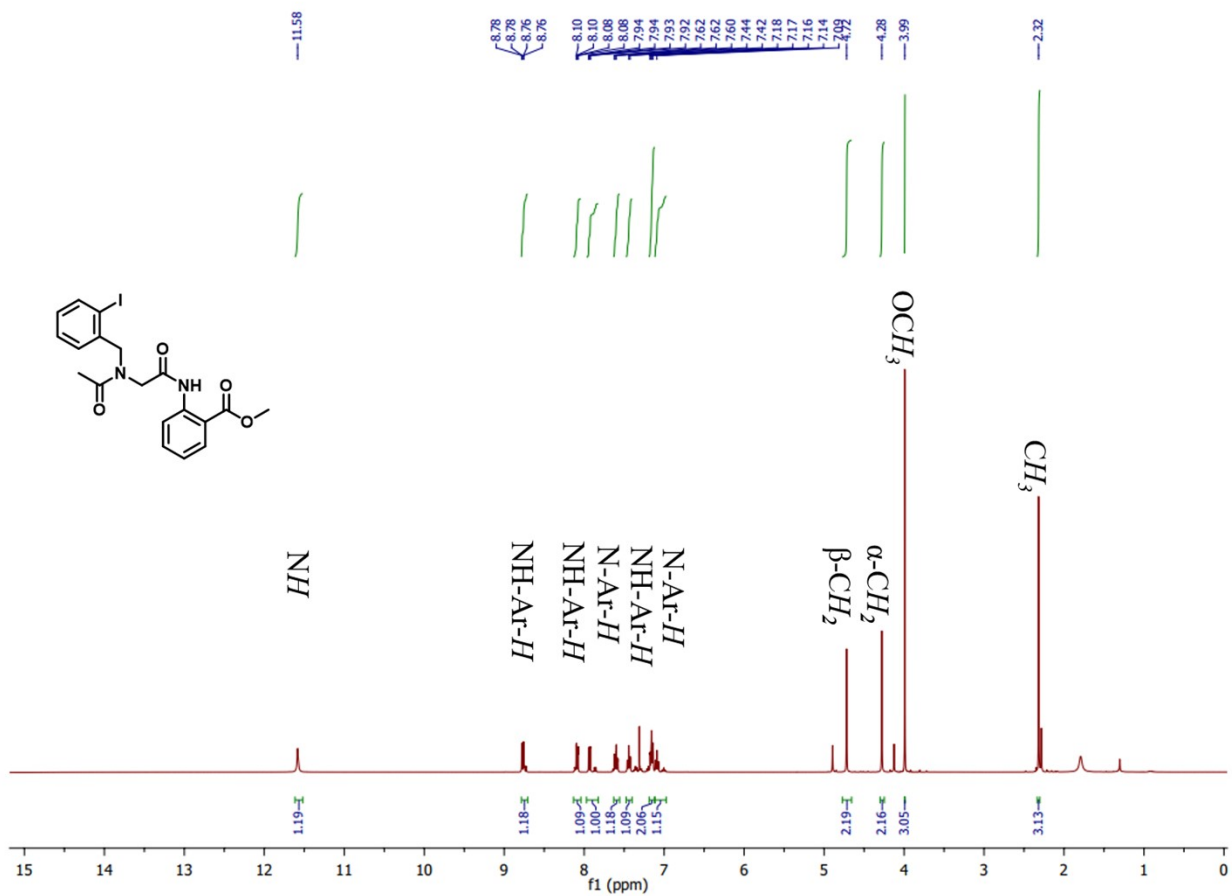

Figure S13. <sup>1</sup>H-NMR Spectra of Peptoid 1-I in CDCl<sub>3</sub>.

Supporting Information

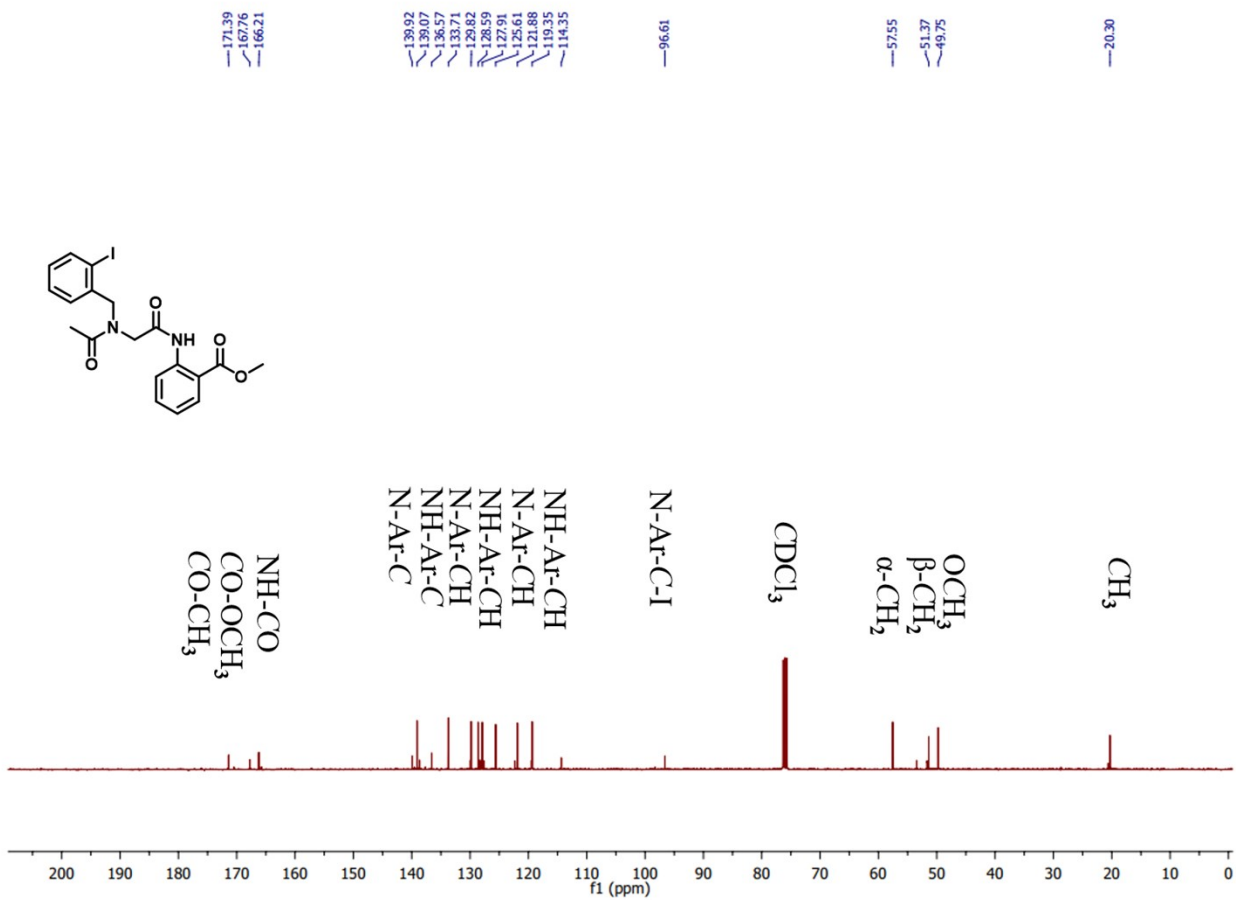

Figure S14.  $^{13}\text{C}$ -NMR Spectra of Peptoid 1-I in  $\text{CDCl}_3$ .

*Supporting Information*

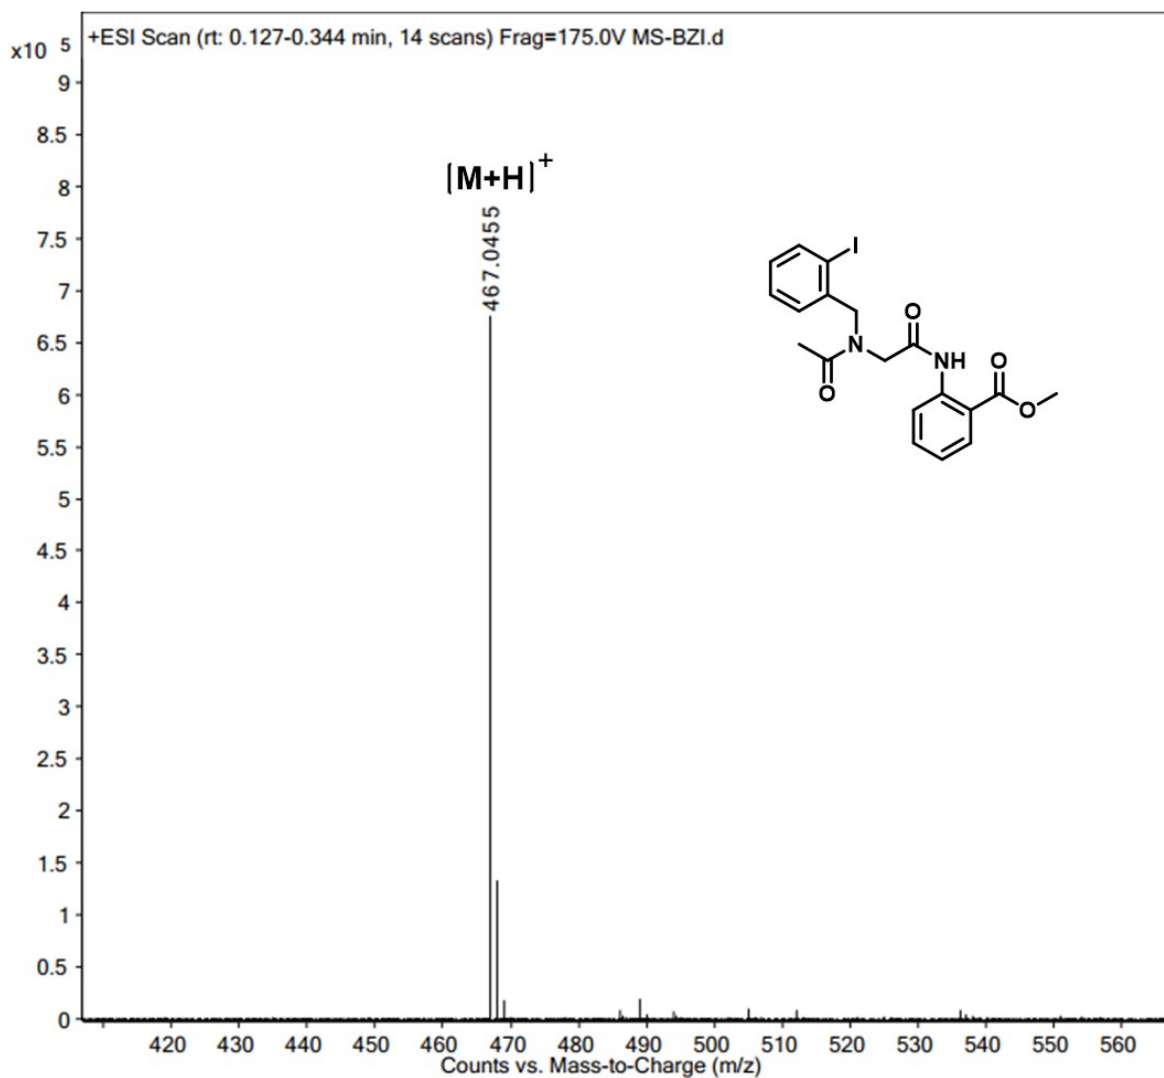

**Figure S15.** Mass spectra of peptoid 1-I.

Supporting Information

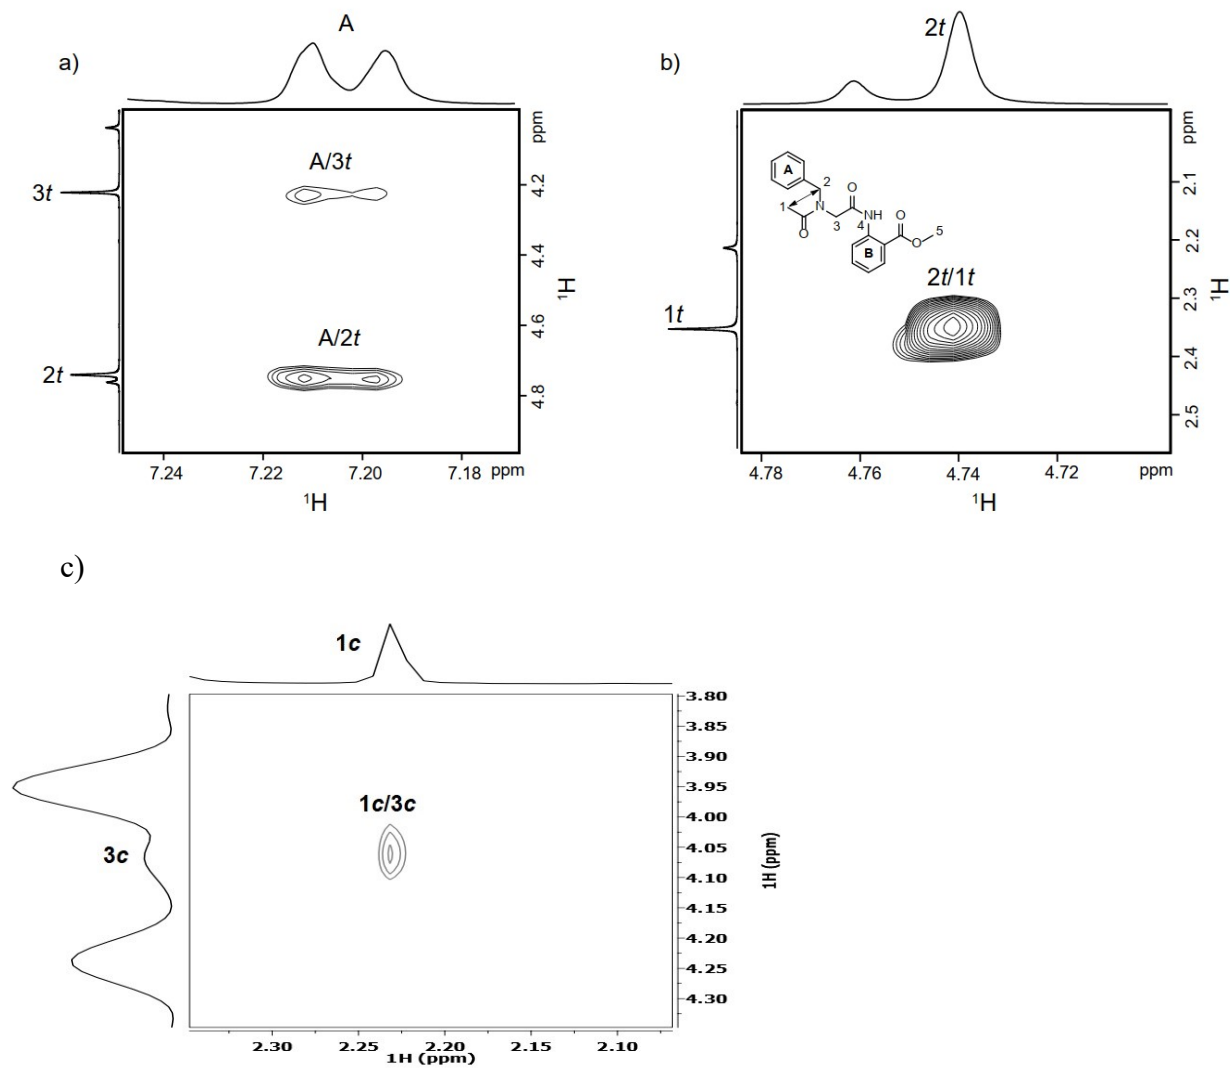

**Figure S16.** Partial 2D  $^1\text{H}$ - $^1\text{H}$  ROSEY spectra of **1-H** peptoid in  $\text{CDCl}_3$  highlighting ROEs in 500 MHz at 300 K: a) Aromatic ring A $\leftrightarrow$ 2t. b) Major conformer 2t $\leftrightarrow$ 1t. c) Minor conformer 1c $\leftrightarrow$ 3c. Note: The double head arrow inserted represents the ROE contours of **1-H**.

## Supporting Information

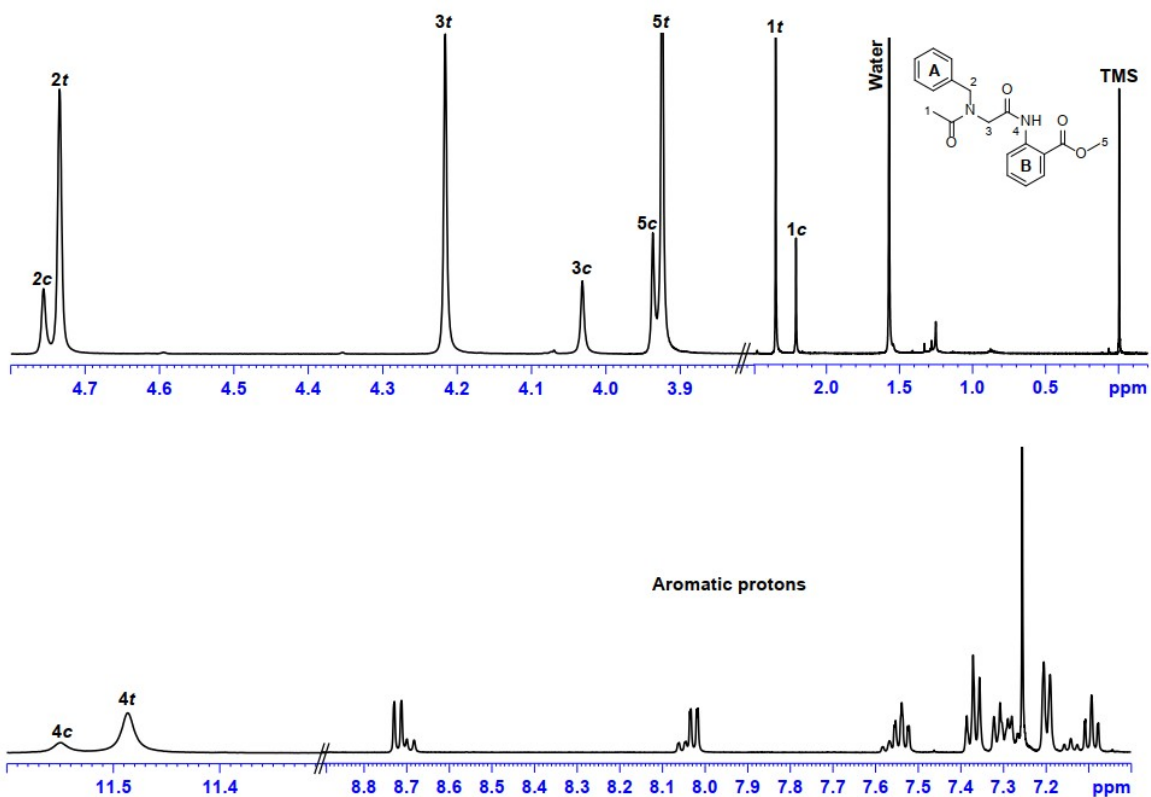

**Figure S17.** The <sup>1</sup>H-NMR Spectra of Peptoid **1-H** in CDCl<sub>3</sub> at 300 K.

Backbone benzylic CH<sub>2</sub> groups show cis-trans isomerization as observed by <sup>1</sup>H-NMR in CDCl<sub>3</sub>,” with “two sets of resonances. Selective 1D ROESY NMR experiments confirm trans isomer to be more populated”.

**Table S2:** <sup>1</sup>H NMR chemical shift values for **1-H** peptoid.

| Position | Chemical shift (ppm)     |
|----------|--------------------------|
| 1        | <b>2.3465</b> , 2.2074   |
| 3        | <b>4.2160</b> , 4.0316   |
| 2        | <b>4.7343</b> , 4.7559   |
| 4        | <b>11.4865</b> , 11.5497 |
| 5        | <b>3.9245</b> , 3.9369   |

Note: chemical shift values for *trans* isomer were shown in bold.



*Supporting Information*

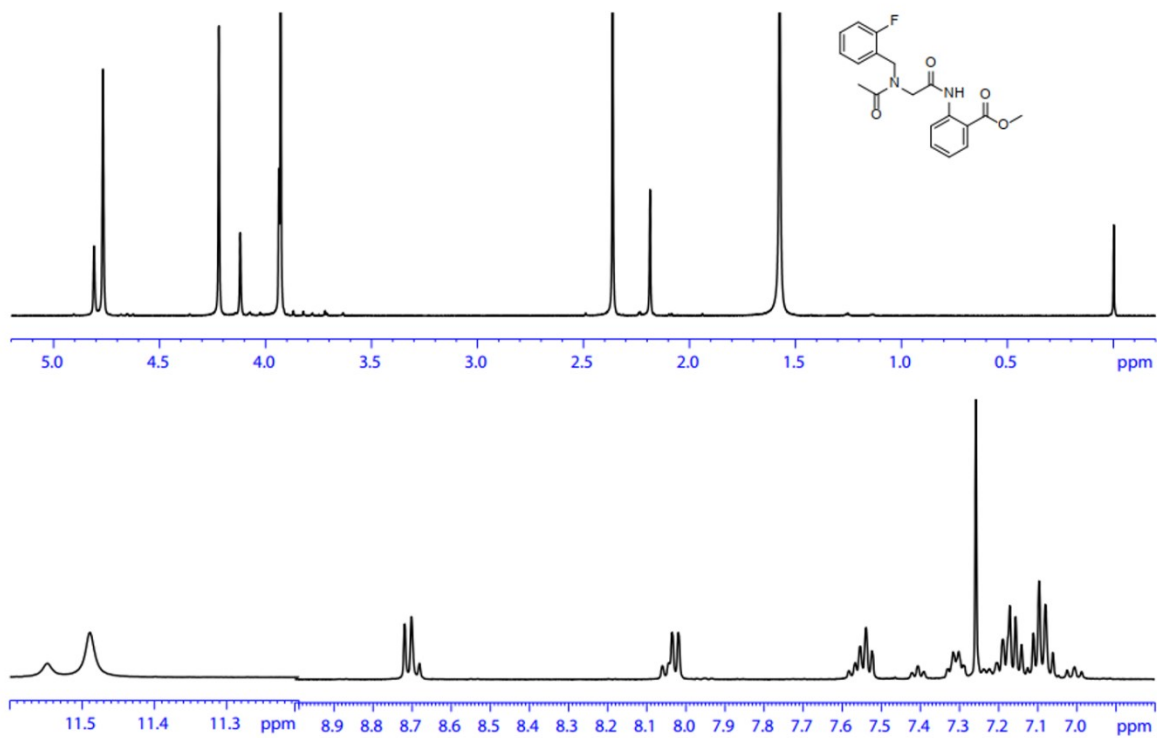

**Figure S18.** <sup>1</sup>H-NMR Spectra of Peptoid 1-F in CDCl<sub>3</sub> at 300 K.

*Supporting Information*

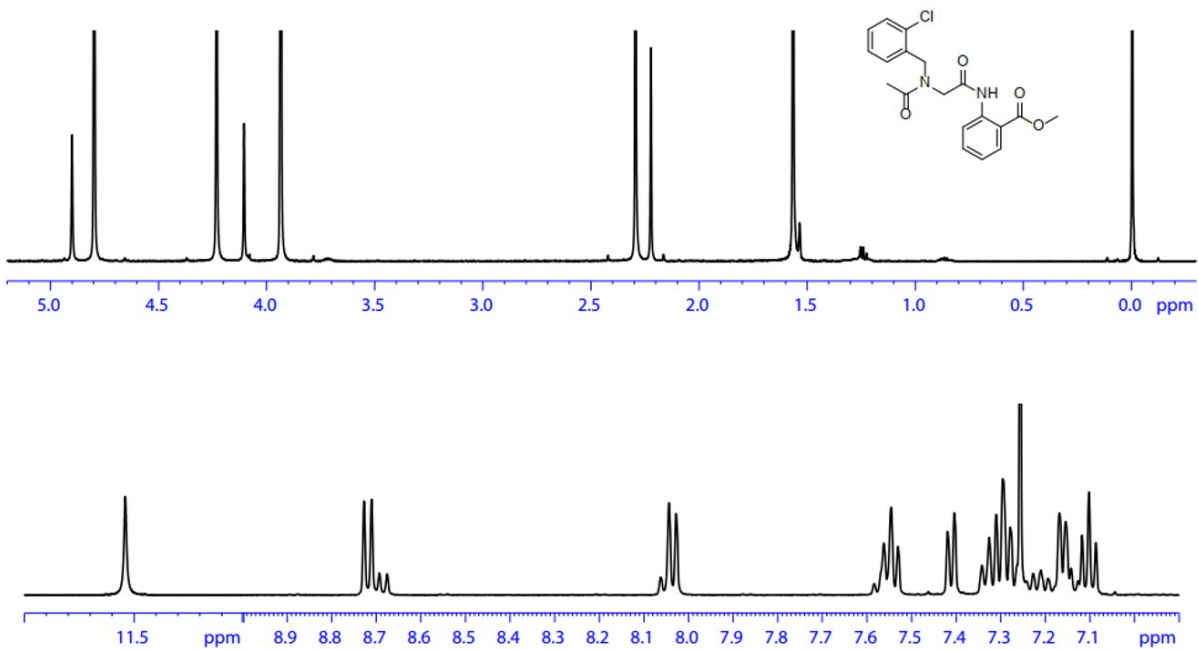

**Figure S19.** <sup>1</sup>H-NMR Spectra of Peptoid **1-Cl** in CDCl<sub>3</sub> at 300 K.

*Supporting Information*

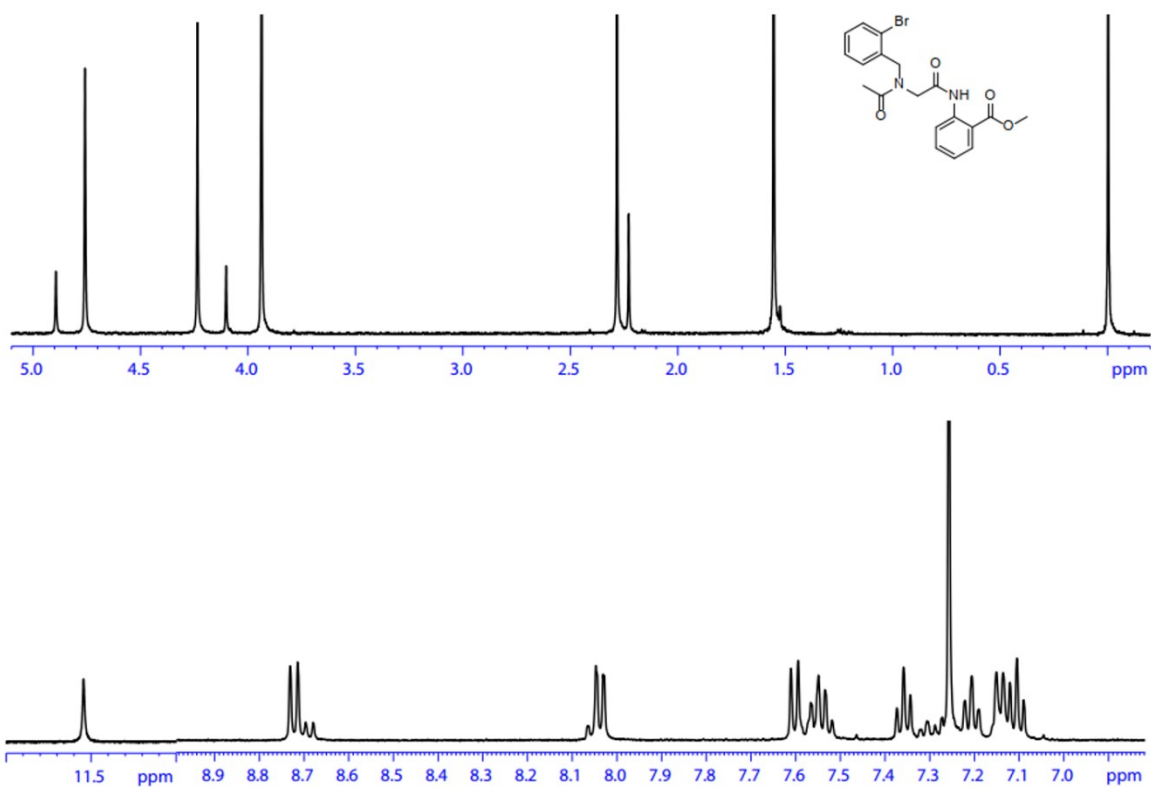

**Figure S20.** <sup>1</sup>H-NMR Spectra of Peptoid **1-Br** in CDCl<sub>3</sub> at 300 K.

*Supporting Information*

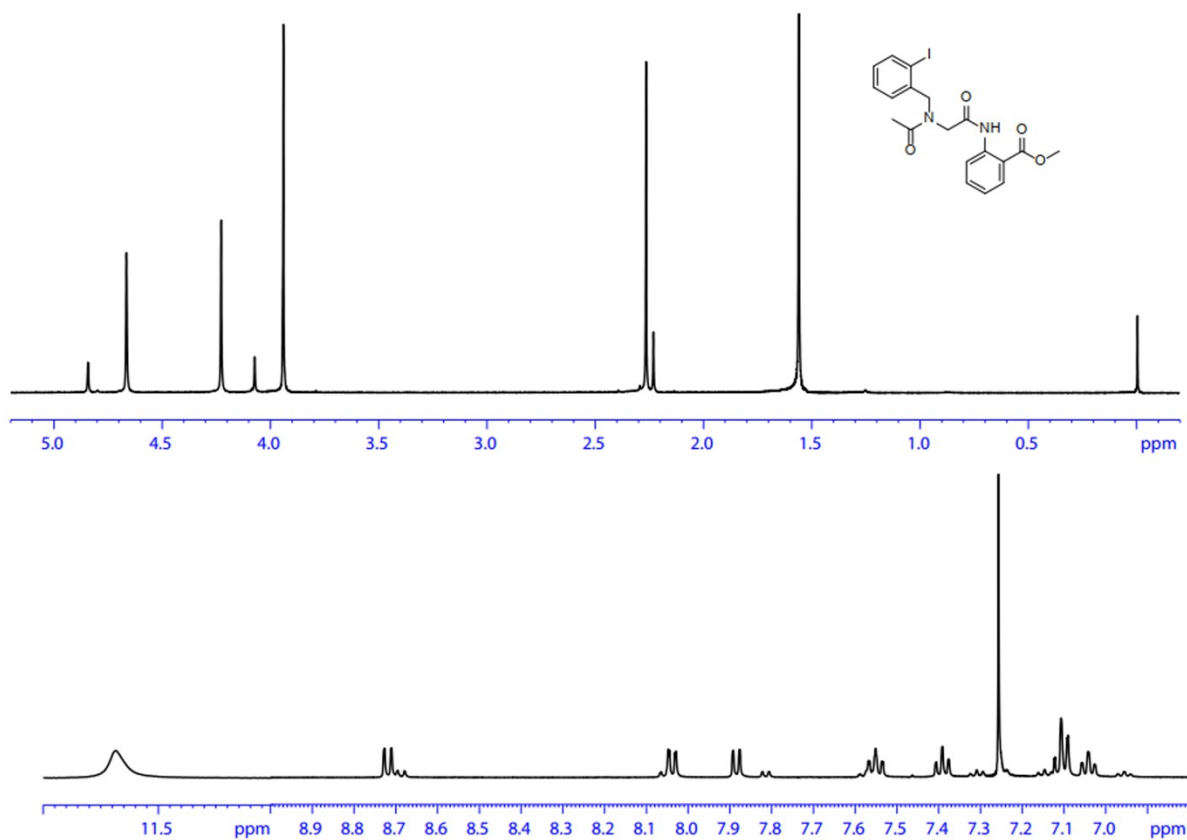

**Figure S21.** <sup>1</sup>H-NMR Spectra of Peptoid 1-I in CDCl<sub>3</sub> at 300 K.

*Supporting Information*

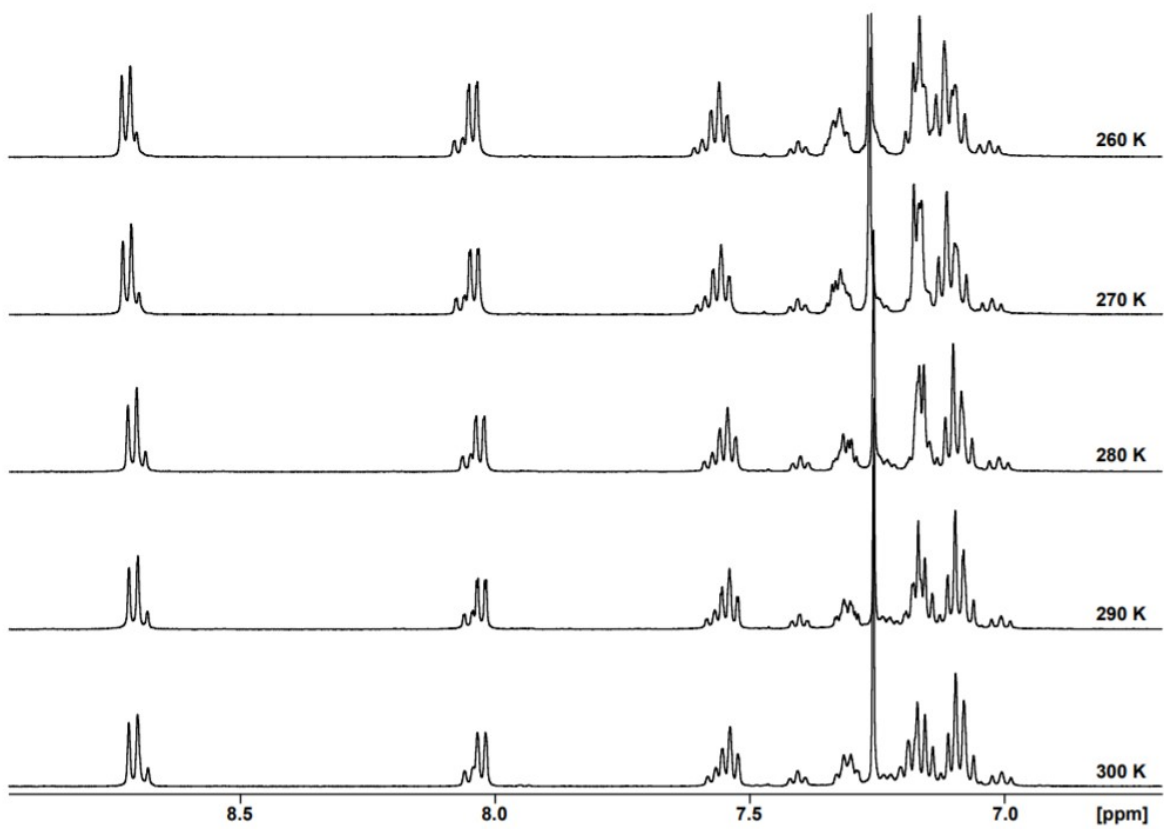

**Figure S22.** Variable Temperature Expanded Aromatic Region <sup>1</sup>H-NMR Spectra of Peptoid 1-F in CDCl<sub>3</sub>.

*Supporting Information*

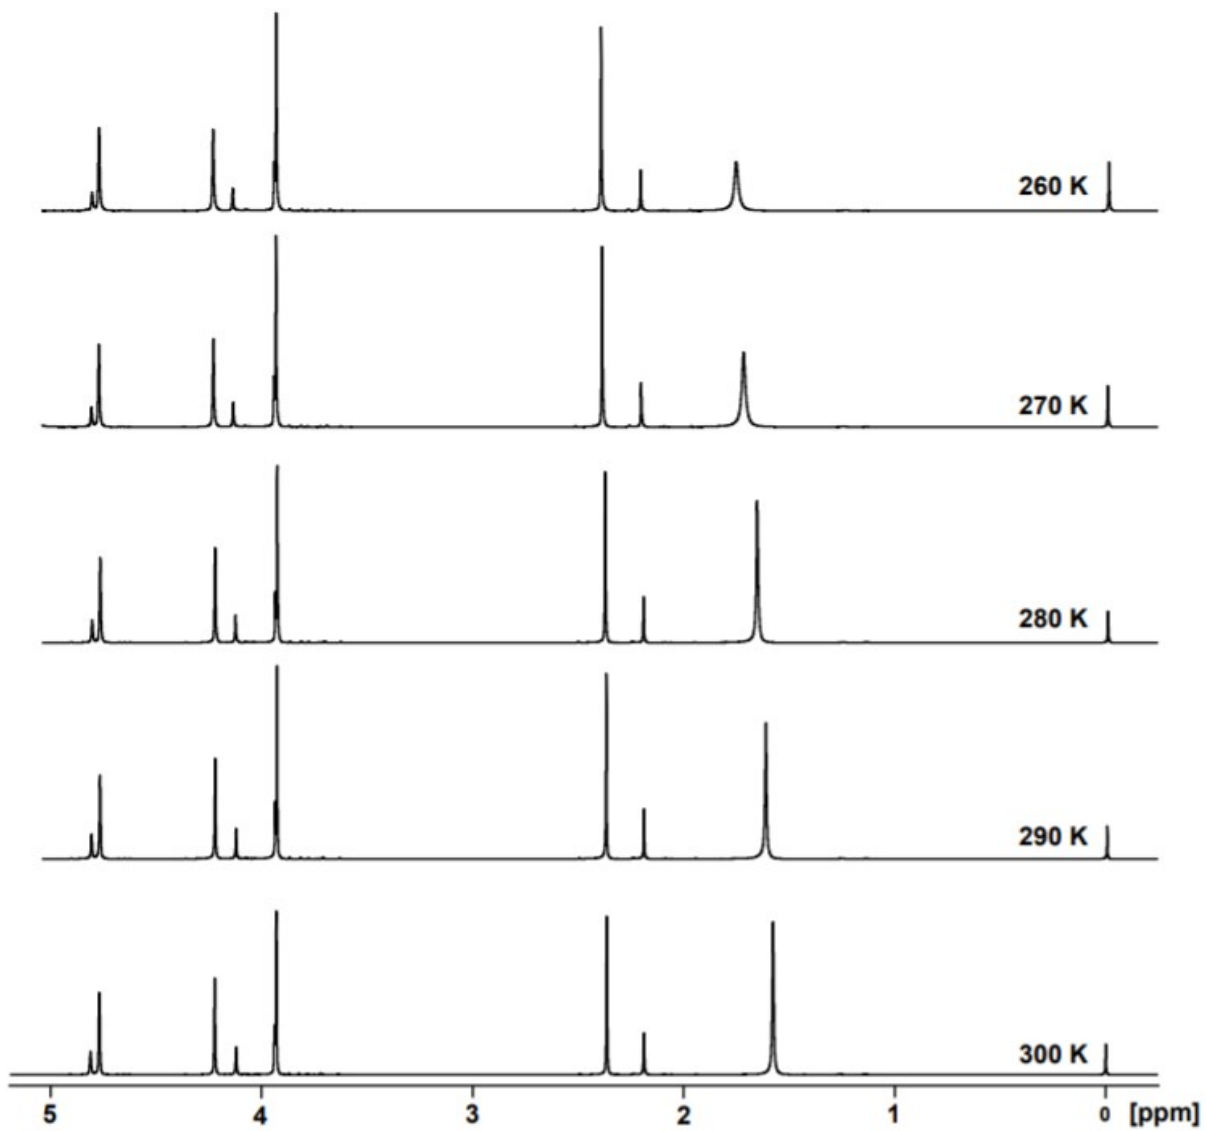

**Figure S23.** Variable Temperature Expanded Aliphatic Region  $^1\text{H-NMR}$  Spectra of Peptoid 1-F in  $\text{CDCl}_3$ .

*Supporting Information*

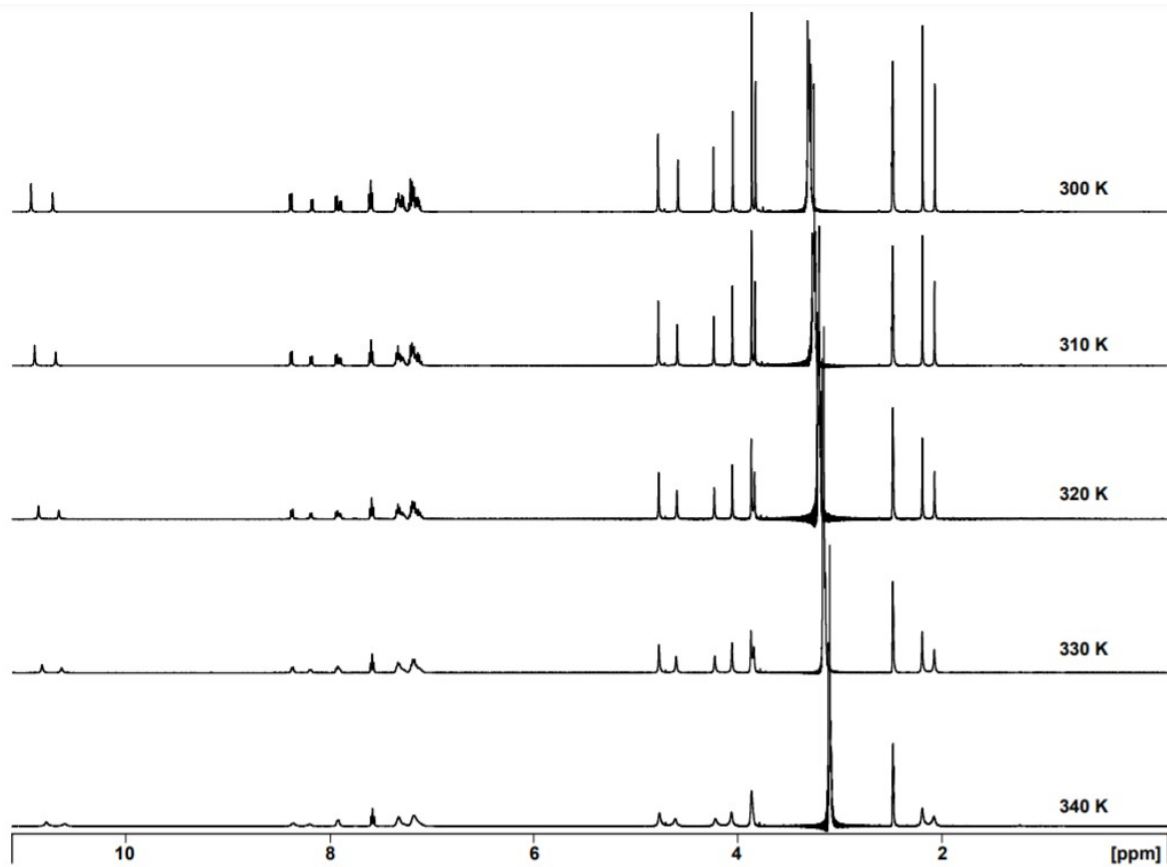

**Figure S24.** Variable Temperature <sup>1</sup>H-NMR Spectra of Peptoid 1-F in DMSO.

*Supporting Information*

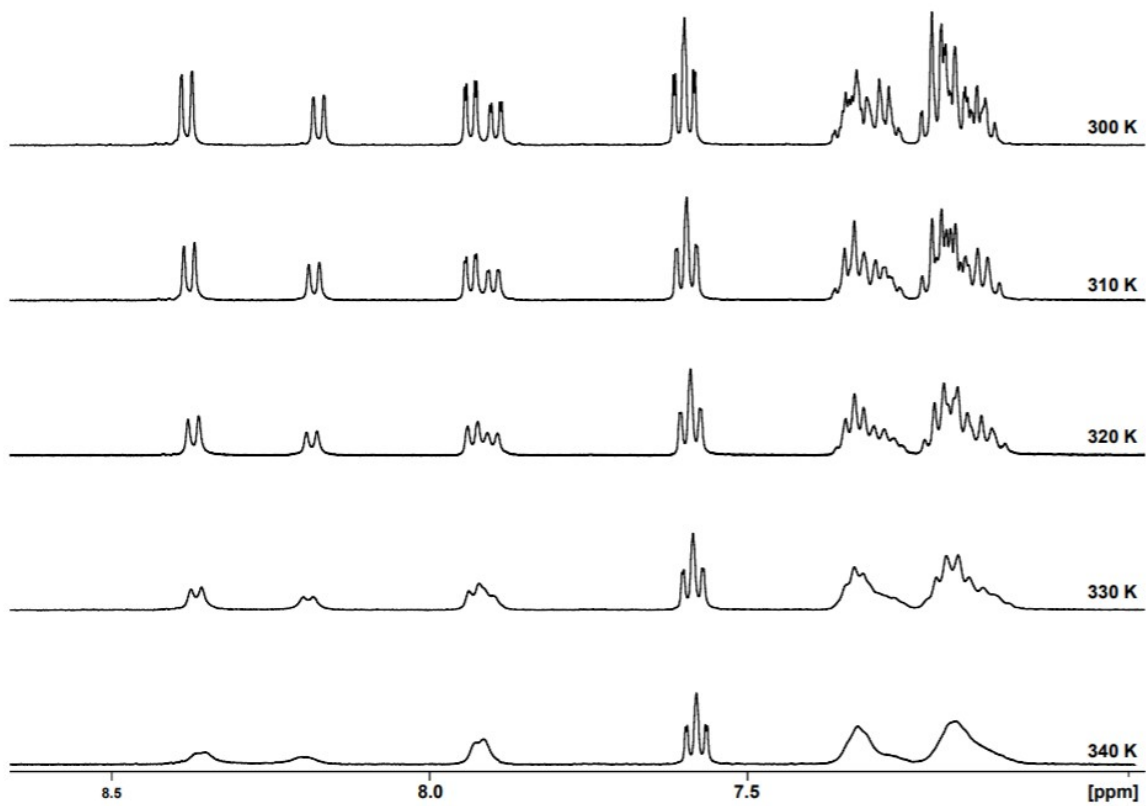

**Figure S25.** Variable Temperature Expanded Aromatic Region  $^1\text{H-NMR}$  Spectra of Peptoid 1-F in DMSO.



*Supporting Information*

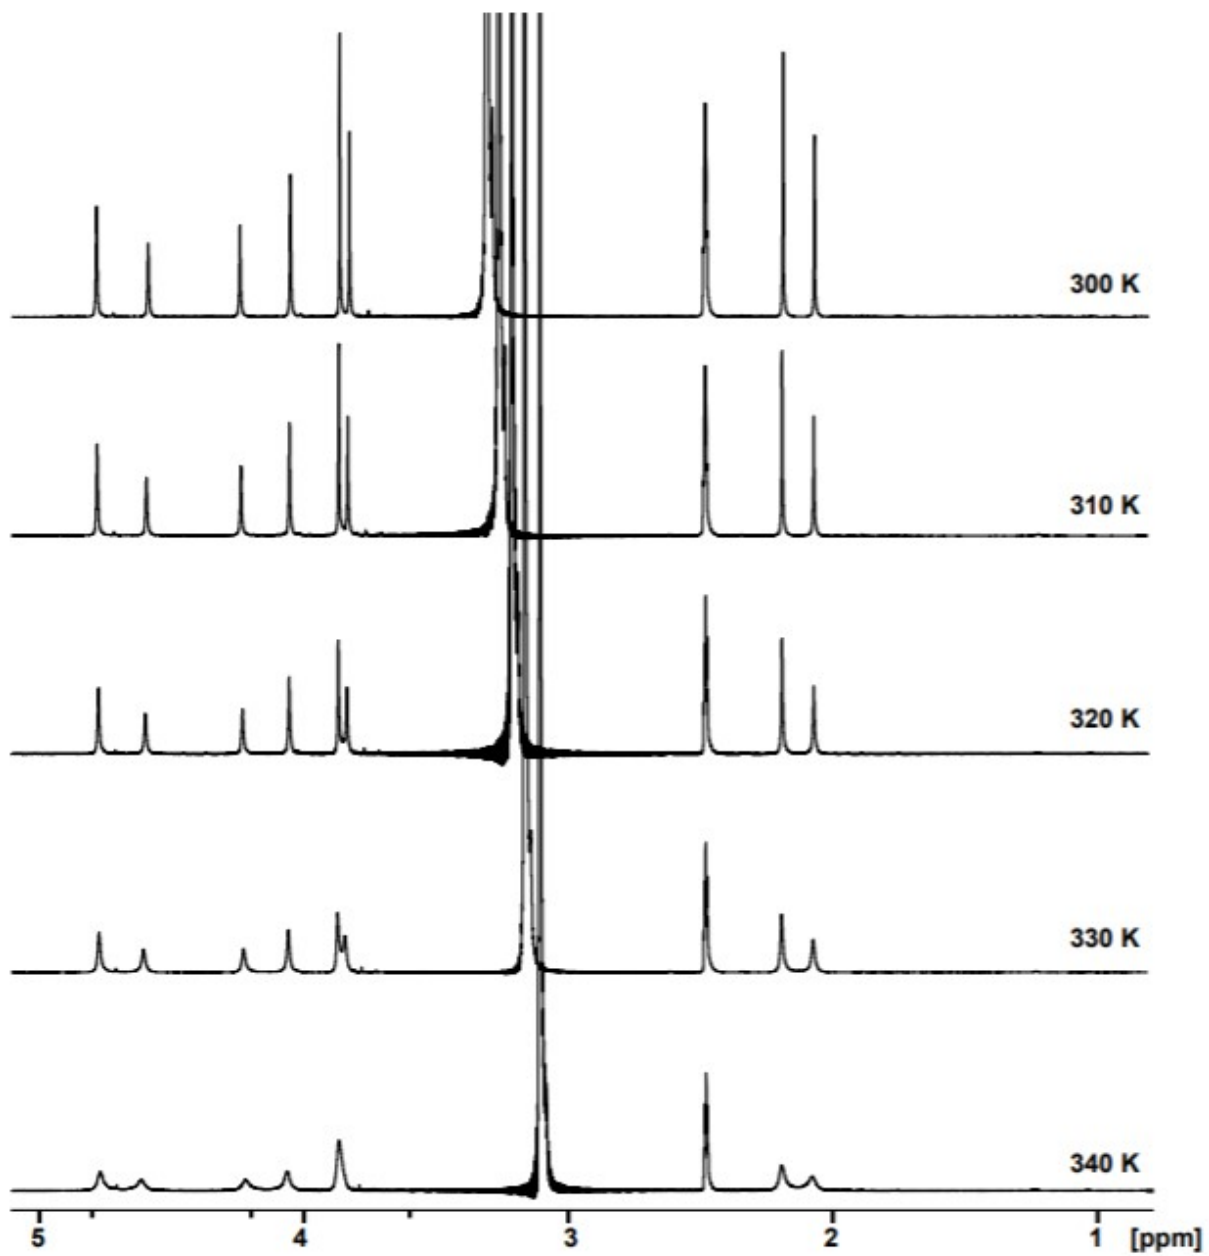

**Figure S26.** Variable Temperature Expanded Aliphatic Region <sup>1</sup>H-NMR Spectra of Peptoid 1-F in DMSO.

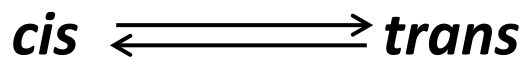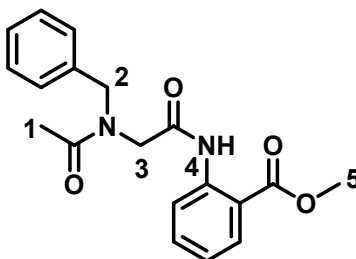

**Table S3:** Thermodynamic parameters for the *trans/cis* equilibrium ( $K_{eq}$ )<sup>a</sup> of peptoids in CDCl<sub>3</sub>.

| Peptoid | $\Delta H$ (J) $\times 10^3$ | $\Delta S$ (J/K) | $\Delta G$ (kcal/mol) |
|---------|------------------------------|------------------|-----------------------|
| 1-H     | -5.63                        | -7.97            | -0.85                 |
| 1-F     | -5.87                        | -9.80            | -0.79                 |
| 1-Cl    | -7.53                        | -13.44           | -0.96                 |
| 1Br     | -7.21                        | -11.96           | -0.98                 |
| 1-I     | -4.76                        | -3.87            | -0.90                 |

<sup>a</sup> $K_{eq} = [trans/cis]$

**Table S4:** *Cis-trans* ratio in solvents

| Compound | Temperature (K) | % <i>trans</i> | % <i>cis</i> | $k_{eq}$ | $\ln(k_{eq})$ | R (J/K·mol) | $\Delta G$ (J/mol) | $\Delta G$ (kcal/mol) |
|----------|-----------------|----------------|--------------|----------|---------------|-------------|--------------------|-----------------------|
| 1-H      | 300             | 73.32          | 26.68        | 2.75     | 1.010876174   | 8.314462618 | -                  | -0.60                 |
| 1-F      | 300             | 71.69          | 28.31        | 2.53     | 0.929122711   | 8.314462618 | -                  | -0.55                 |
| 1-Cl     | 300             | 70.13          | 29.87        | 2.35     | 0.853315933   | 8.314462618 | -                  | -0.51                 |
| 1-Br     | 300             | 70.63          | 29.37        | 2.40     | 0.877310432   | 8.314462618 | -                  | -0.52                 |
| 1-I      | 300             | 71.11          | 28.89        | 2.46     | 0.90090963    | 8.314462618 | -                  | -0.54                 |

*Supporting Information*

**Table S5:** van't Hoff plot

| Temperature, T (K) | % <i>trans</i> | % <i>cis</i> | $K_{eq}$ | 1/T     | ln ( $K_{eq}$ ) |
|--------------------|----------------|--------------|----------|---------|-----------------|
| 260                | 85.14          | 14.86        | 5.73     | 0.00385 | 1.745830537     |
| 270                | 84.44          | 15.56        | 5.43     | 0.00370 | 1.691190414     |
| 280                | 82.48          | 17.52        | 4.71     | 0.00357 | 1.54928399      |
| 290                | 81.05          | 18.95        | 4.28     | 0.00345 | 1.45328923      |
| 300                | 81.77          | 18.23        | 4.49     | 0.00333 | 1.501032039     |

| Slope (m), $-ΔH/R$ | Y-intercept, $ΔS/R$ | $ΔH$ (J) | $ΔS$ (J/K) | $ΔG$ (J/mol) | $ΔG$ (kcal/mol) |
|--------------------|---------------------|----------|------------|--------------|-----------------|
| 573.58             | -0.4656             | -4769.01 | -3.87      | -3762.493882 | -0.90           |

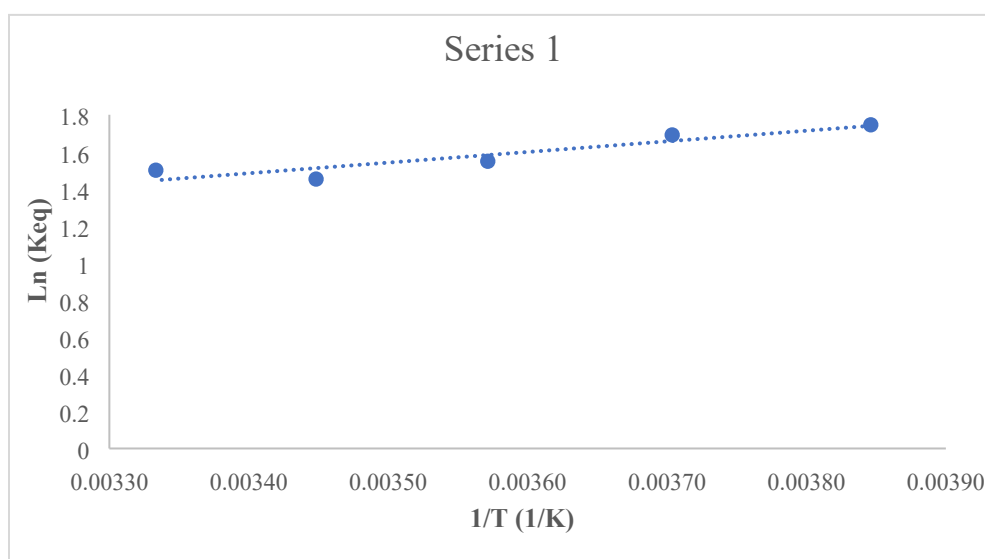

## Supporting Information

### 6. HPLC Data

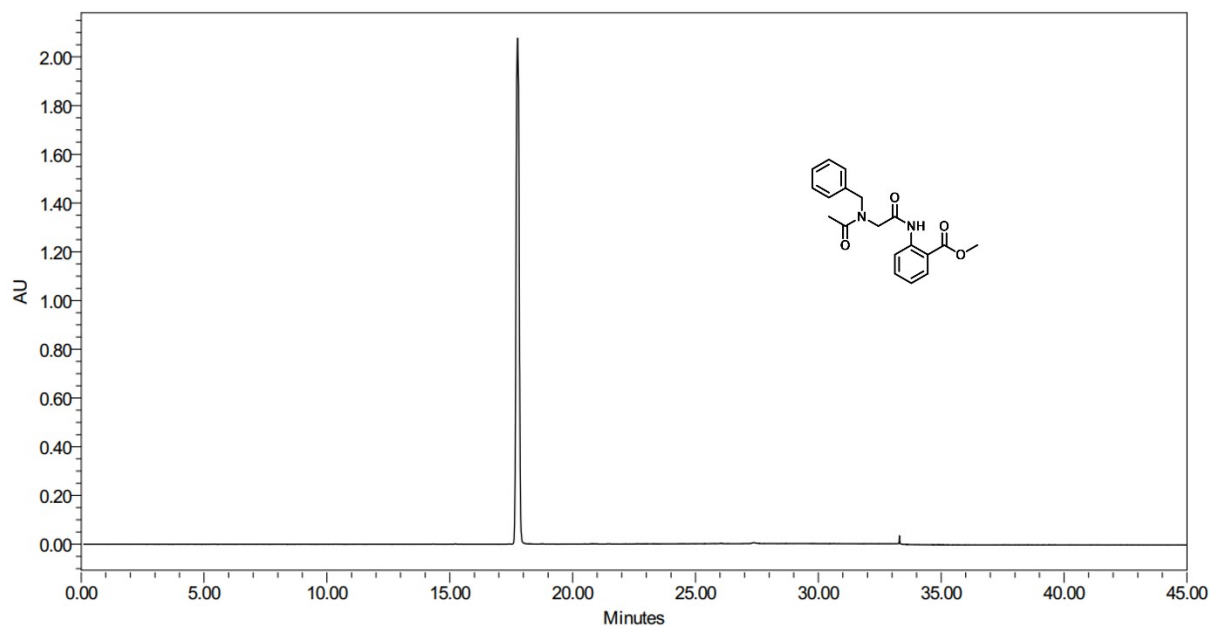

**Figure S27.** Characterization of peptoid **1-H** by RP-HPLC.

**Analytical HPLC Condition:** Luna C18 (4.6 × 150 mm column, 5 μm particle size), Acetonitrile (solvent A), Water (solvent B), Gradient 20 % solvent A to 100 % solvent B in 45 min, the flow rate of 1 mL min<sup>-1</sup>, Injection volume 2 μL, Column temperature 5-10 °C, Detection wavelength= 221 nm. No separation of cis and trans isomers of peptoids was observed by RP-HPLC.

*Supporting Information*

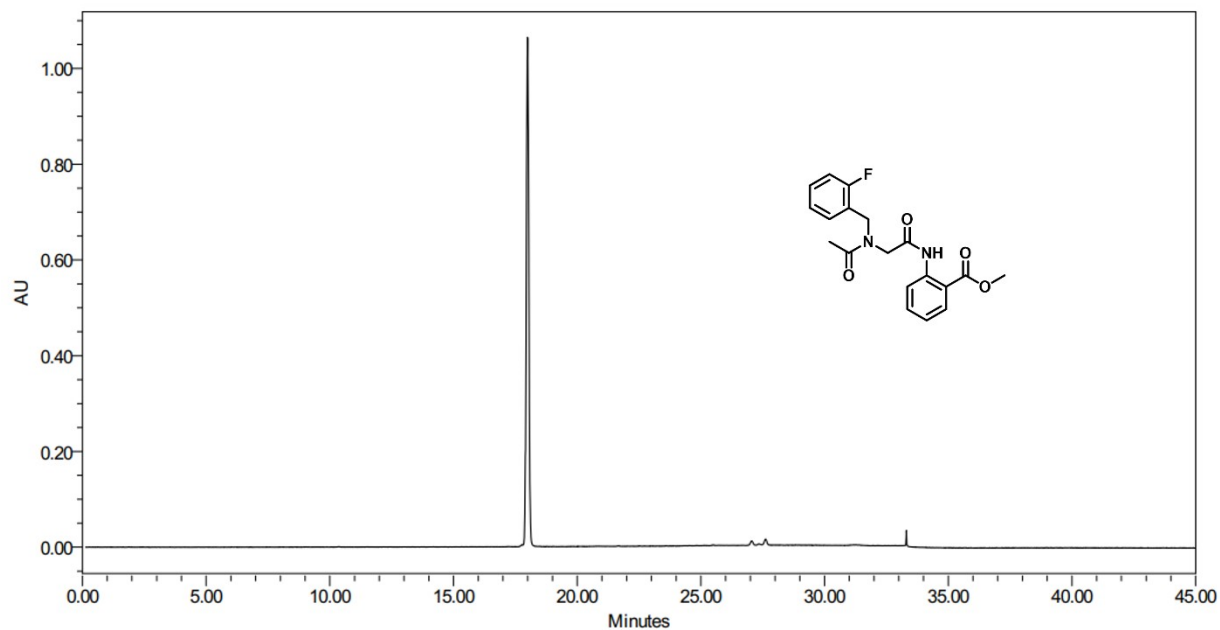

**Figure S28.** Characterization of ortho-substituted peptoid **1-F** by RP-HPLC.

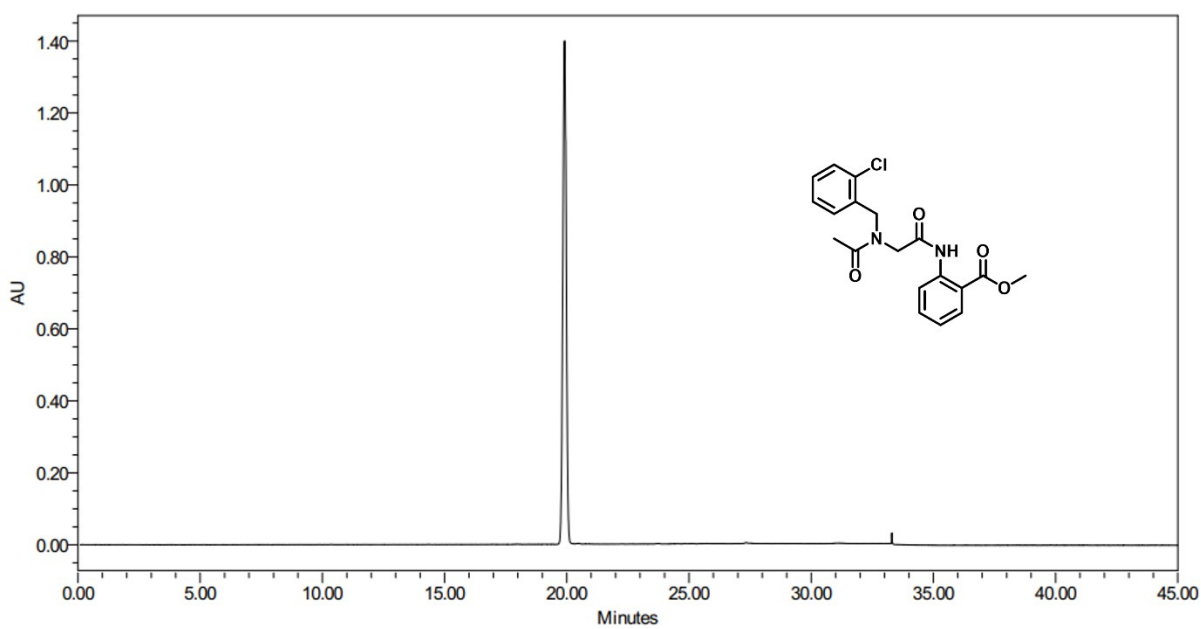

**Figure S29.** Characterization of ortho-substituted peptoid **1-Cl** by RP-HPLC.

*Supporting Information*

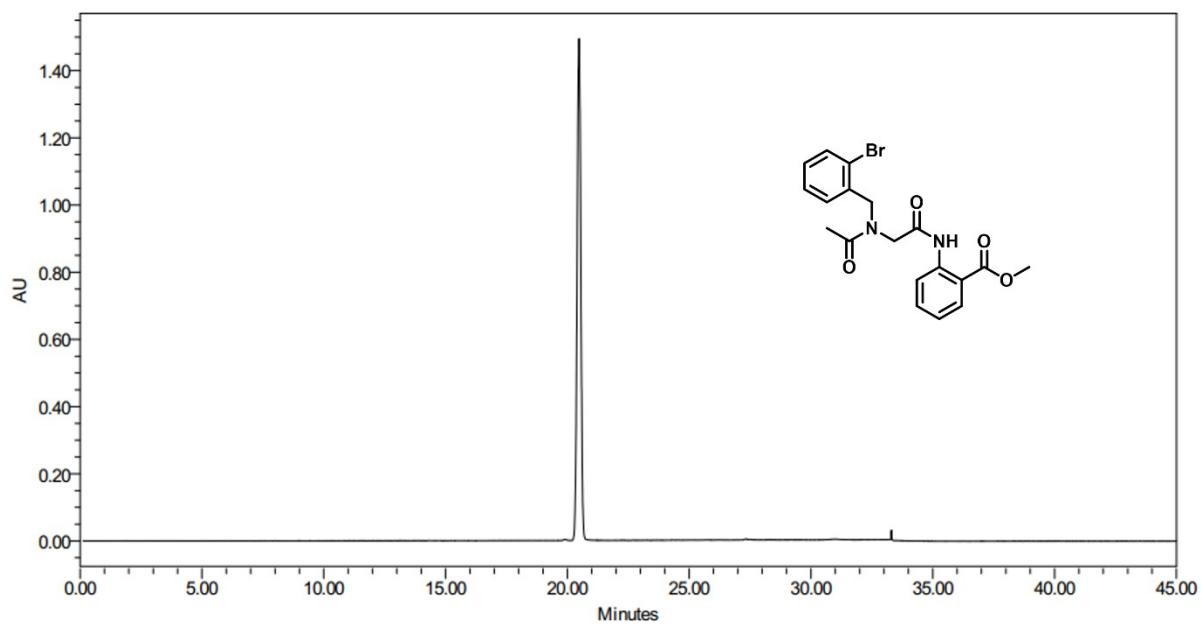

**Figure S30.** Characterization of ortho-substituted peptoid **1-Br** by RP-HPLC.

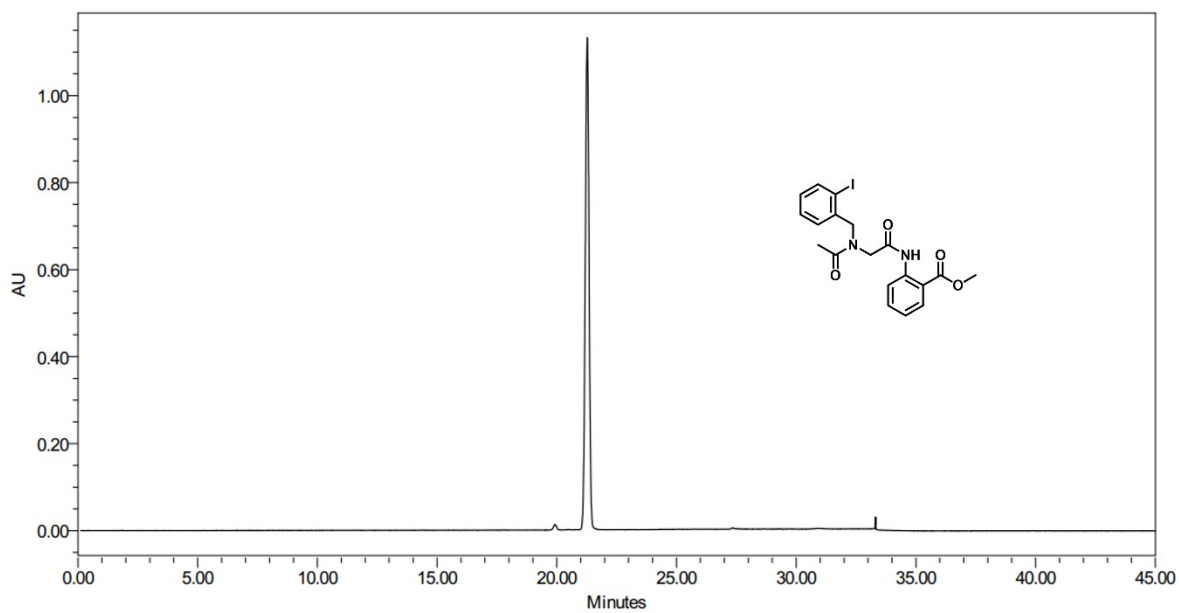

**Figure S31.** Characterization of ortho-substituted peptoid **1-I** by RP-HPLC.

## 7. Crystallographic Data

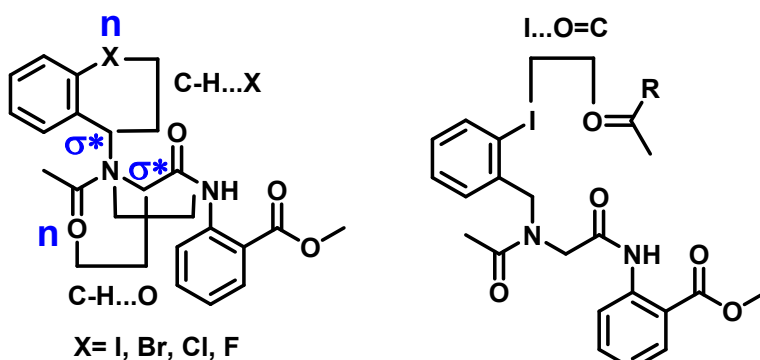

**Scheme 3.** Noncovalent interaction depicting C-H---O, C-H---X (Hydrogen Bonding), and C<sub>aryl</sub>-X---O=C (Halogen Bonding).

We further investigated the crystal structures of N-benzyl peptoid model systems: **1-H**, **1-F**, **1-Cl**, **1-Br** and **1-I**.

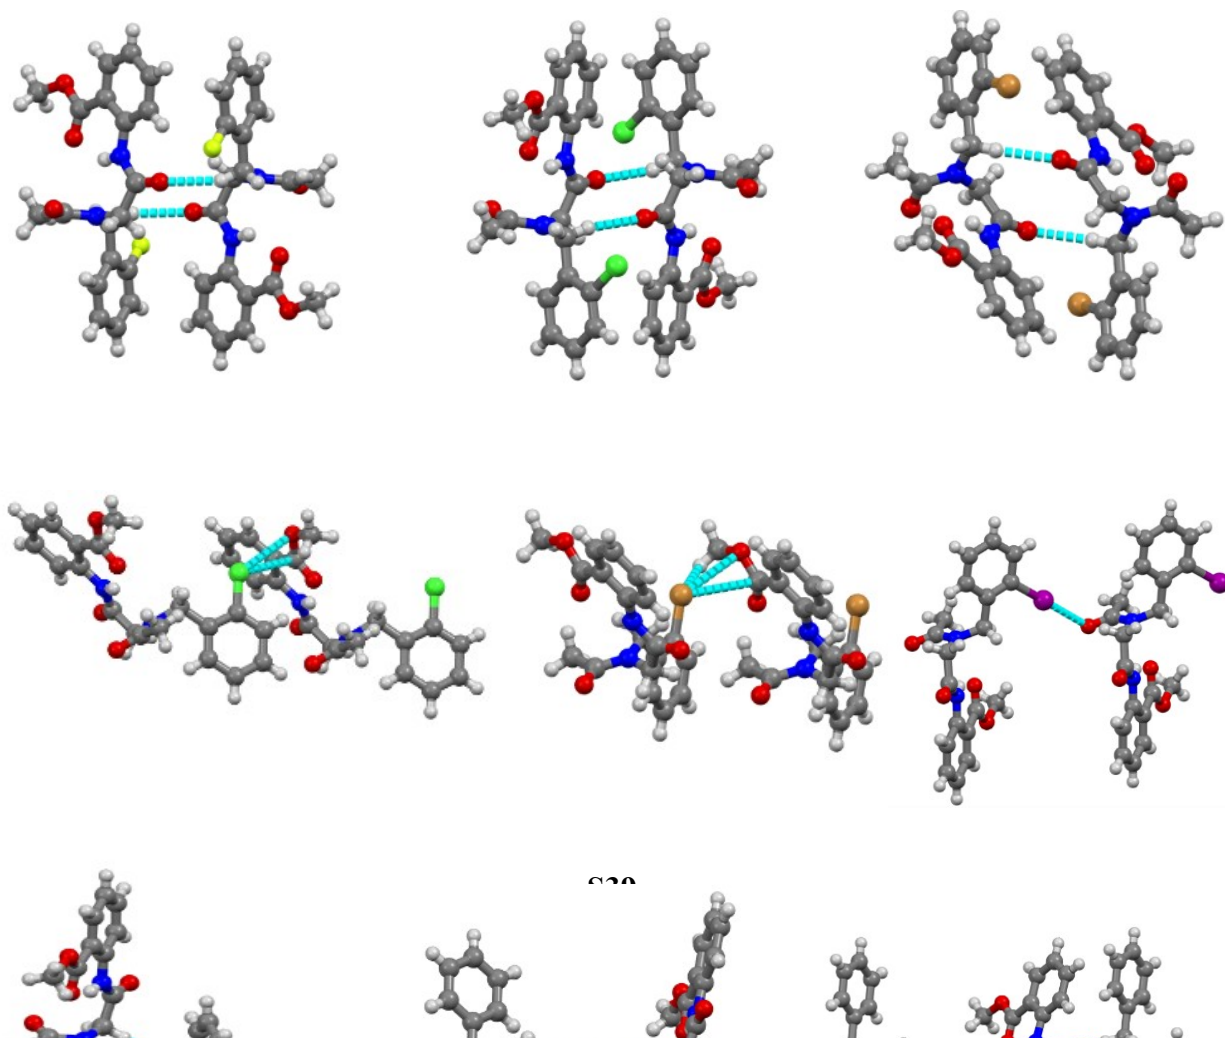

*Supporting Information*

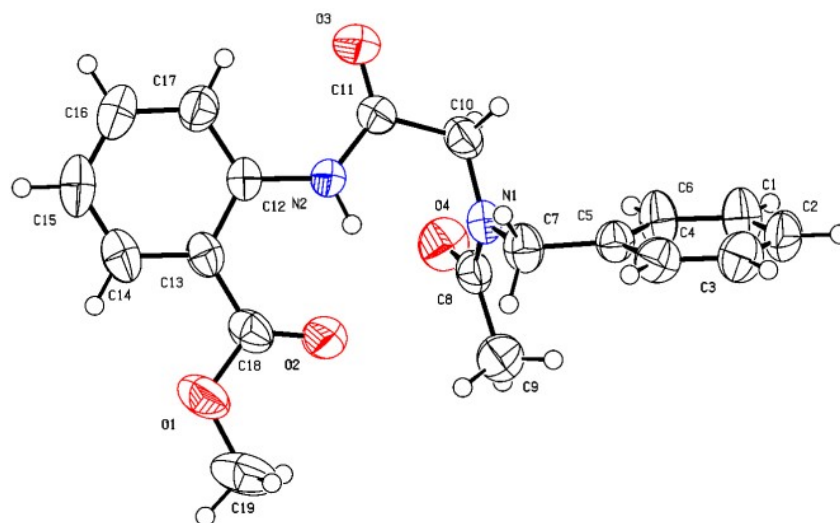

**Figure S33.** Crystal structure ORTEP diagram of ortho-substituted peptoid **1-H**.

**Table S6.** Crystallographic data and structure refinement of peptoid **1-H**

|                      |                                                               |
|----------------------|---------------------------------------------------------------|
| Empirical formula    | C <sub>19</sub> H <sub>20</sub> N <sub>2</sub> O <sub>4</sub> |
| Formula Weight       | 340.3790                                                      |
| Crystal system       | triclinic                                                     |
| Space group          | P -1                                                          |
| Temperature          | 296 K                                                         |
| Wavelength           | 0.71073 Å                                                     |
| Unit cell dimensions | a = 8.4482(19) Å, $\alpha$ = 101.727(12)                      |
|                      | b = 10.535(3) Å, $\beta$ = 97.628(11)                         |
|                      | c = 10.731(3) Å, $\gamma$ = 104.253(13)                       |



**Supporting Information**

|                                                  |                         |
|--------------------------------------------------|-------------------------|
| Volume                                           | 889.4(4) Å <sup>3</sup> |
| Z, Calculated density                            | 2                       |
| Absorption coefficient $\mu$ (mm <sup>-1</sup> ) | 0.090 mm <sup>-1</sup>  |
| F(000)                                           | 360.0                   |
| Crystal size                                     | 0.20 mm                 |
| $D_{\text{cal}}$ (g/cm <sup>-3</sup> )           | 1.271                   |
| Refinement method                                | SHELXT                  |
| Reflections collected                            | 4499                    |
| $R_1$ [ $I > 2 \sigma(I)$ ]                      | 0.0611                  |
| w $R_2$ (all data)                               | 0.1678                  |
| Goodness of Fit                                  | 0.960                   |

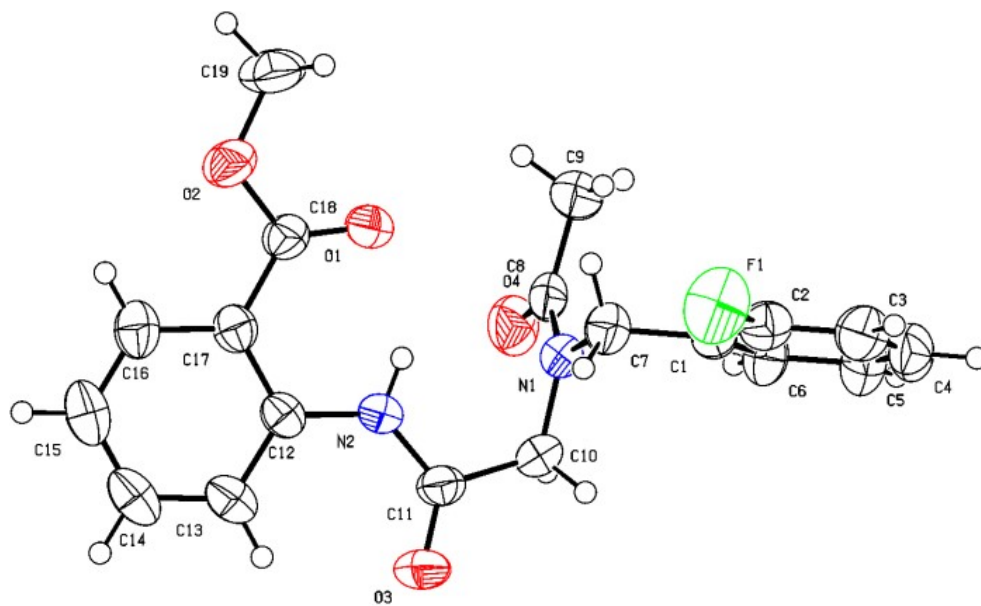

**Figure S34.** Crystal structure ORTEP diagram of ortho-substituted peptoid **1-F**.

*Supporting Information*

**Table S7.** Crystallographic data and structure refinement of peptoid **1-F**

|                                              |                                                                 |
|----------------------------------------------|-----------------------------------------------------------------|
| Empirical formula                            | C <sub>19</sub> H <sub>19</sub> F N <sub>2</sub> O <sub>4</sub> |
| Formula Weight                               | 358.3694                                                        |
| Crystal system                               | triclinic                                                       |
| Space group                                  | P -1                                                            |
| Temperature                                  | 296 K                                                           |
| Wavelength                                   | 0.71073 Å                                                       |
| Unit cell dimensions                         | a = 9.5349(6) Å, α = 76.135(3)                                  |
|                                              | b = 10.5406(7) Å, β = 66.751(3)                                 |
|                                              | c = 10.6231(7) Å, γ = 64.827(3)                                 |
| Volume                                       | 884.49(10) Å <sup>3</sup>                                       |
| Z, Calculated density                        | 2                                                               |
| Absorption coefficient μ (mm <sup>-1</sup> ) | 0.102 mm <sup>-1</sup>                                          |
| F(000)                                       | 376.0                                                           |
| Crystal size                                 | 0.20 mm                                                         |
| D <sub>cal</sub> (g/cm <sup>-3</sup> )       | 1.346                                                           |
| Refinement method                            | SHELXT                                                          |
| Reflections collected                        | 5426                                                            |
| R <sub>1</sub> [I > 2 sigma(I)]              | 0.0502                                                          |
| wR <sub>2</sub> (all data)                   | 0.1589                                                          |
| Goodness of Fit                              | 0.992                                                           |

Supporting Information

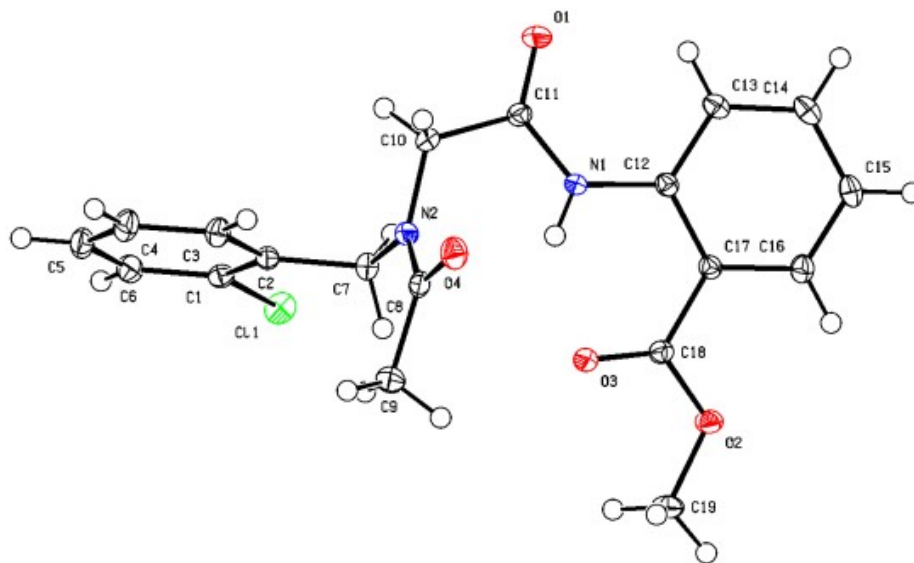

**Figure S35.** Crystal structure ORTEP diagram of ortho-substituted peptoid **1-Cl**.

**Table S8.** Crystallographic data and structure refinement of peptoid **1-Cl**

|                       |                                          |
|-----------------------|------------------------------------------|
| Empirical formula     | $C_{19}H_{19}ClN_2O_4$                   |
| Formula Weight        | 374.8210                                 |
| Crystal system        | triclinic                                |
| Space group           | P -1                                     |
| Temperature           | 100 K                                    |
| Wavelength            | 0.71073 Å                                |
| Unit cell dimensions  | $a = 9.5811(3)$ Å, $\alpha = 74.919(2)$  |
|                       | $b = 10.4629(4)$ Å, $\beta = 66.039(2)$  |
|                       | $c = 10.6719(4)$ Å, $\gamma = 64.784(2)$ |
| Volume                | $879.53(6)$ Å <sup>3</sup>               |
| Z, Calculated density | 2                                        |

### Supporting Information

|                                                  |                        |
|--------------------------------------------------|------------------------|
| Absorption coefficient $\mu$ (mm <sup>-1</sup> ) | 0.245 mm <sup>-1</sup> |
| F(000)                                           | 392.0                  |
| Crystal size                                     | 0.20 mm                |
| $D_{\text{cal}}$ (g/cm <sup>-3</sup> )           | 1.415                  |
| Refinement method                                | SHELXT                 |
| Reflections collected                            | 5363                   |
| $R_1$ [ $I > 2 \sigma(I)$ ]                      | 0.0381                 |
| $wR_2$ (all data)                                | 0.1116                 |
| Goodness of Fit                                  | 0.995                  |

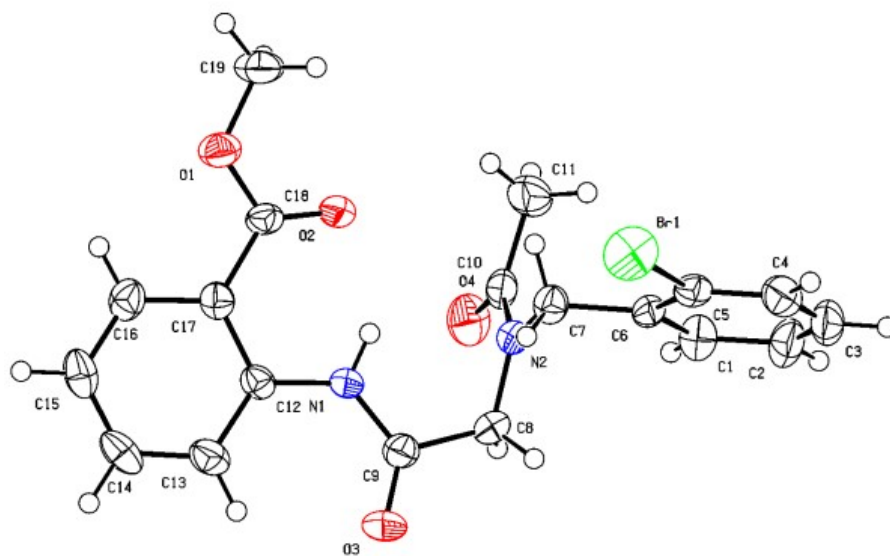

**Figure S36.** Crystal structure ORTEP diagram of ortho-substituted peptoid **1-Br**.

**Table S9.** Crystallographic data and structure refinement of peptoid **1-Br**

|                   |                                                                  |
|-------------------|------------------------------------------------------------------|
| Empirical formula | C <sub>19</sub> H <sub>19</sub> Br N <sub>2</sub> O <sub>4</sub> |
|-------------------|------------------------------------------------------------------|

### Supporting Information

|                                                  |                                        |
|--------------------------------------------------|----------------------------------------|
| Formula Weight                                   | 419.2750                               |
| Crystal system                                   | triclinic                              |
| Space group                                      | P -1                                   |
| Temperature                                      | 296 K                                  |
| Wavelength                                       | 0.71073 Å                              |
| Unit cell dimensions                             | a = 9.6335(9) Å, $\alpha$ = 74.967(4)  |
|                                                  | b = 10.5541(11) Å, $\beta$ = 66.776(4) |
|                                                  | c = 10.7463(9) Å, $\gamma$ = 66.004(4) |
| Volume                                           | 910.89(15) Å <sup>3</sup>              |
| Z, Calculated density                            | 2                                      |
| Absorption coefficient $\mu$ (mm <sup>-1</sup> ) | 2.283 mm <sup>-1</sup>                 |
| F(000)                                           | 428.0                                  |
| Crystal size                                     | 0.500 mm                               |
| $D_{\text{cal}}$ (g/cm <sup>-3</sup> )           | 1.529                                  |
| Refinement method                                | SHELXT                                 |
| Reflections collected                            | 4545                                   |
| $R_1$ [ $I > 2 \sigma(I)$ ]                      | 0.0620                                 |
| w $R_2$ (all data)                               | 0.2054                                 |
| Goodness of Fit                                  | 0.951                                  |

Supporting Information

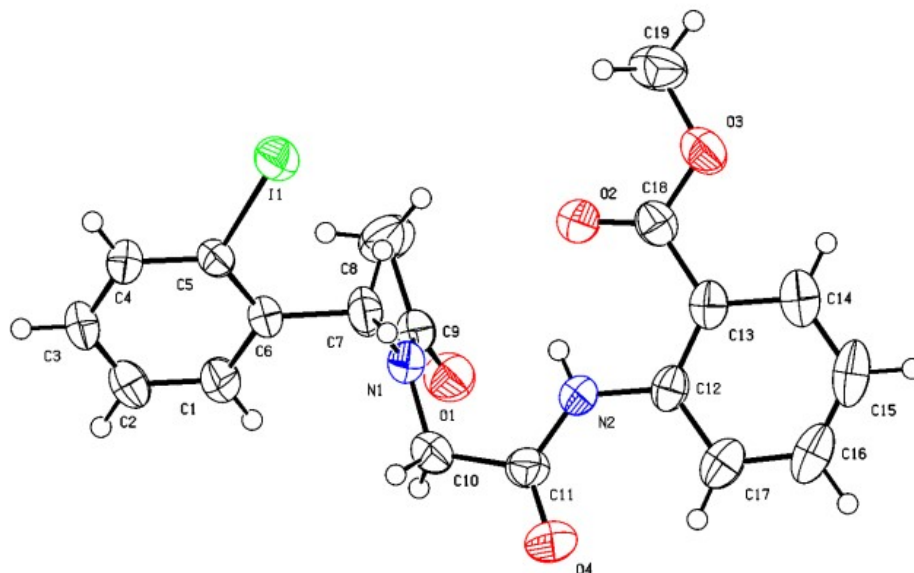

Figure S37. Crystal structure ORTEP diagram of ortho-substituted peptoid **1-I**.

Table S10. Crystallographic data and structure refinement of peptoid **1-I**

|                       |                                                                |
|-----------------------|----------------------------------------------------------------|
| Empirical formula     | C <sub>19</sub> H <sub>19</sub> IN <sub>2</sub> O <sub>4</sub> |
| Formula Weight        | 466.2755                                                       |
| Crystal system        | triclinic                                                      |
| Space group           | P -1                                                           |
| Temperature           | 296 K                                                          |
| Wavelength            | 0.71073 Å                                                      |
| Unit cell dimensions  | a = 8.7203(5) Å, $\alpha$ = 74.064(3)                          |
|                       | b = 9.1769(7) Å, $\beta$ = 88.893(3)                           |
|                       | c = 13.4991(9) Å, $\gamma$ = 71.669(3)                         |
| Volume                | 983.38(12) Å <sup>3</sup>                                      |
| Z, Calculated density | 2                                                              |

*Supporting Information*

|                                                  |                        |
|--------------------------------------------------|------------------------|
| Absorption coefficient $\mu$ (mm <sup>-1</sup> ) | 1.653 mm <sup>-1</sup> |
| F(000)                                           | 464.0                  |
| Crystal size                                     | 0.350 mm               |
| $D_{\text{cal}}$ (g/cm <sup>-3</sup> )           | 1.575                  |
| Refinement method                                | SHELXT                 |
| Reflections collected                            | 4925                   |
| $R_1$ [ $I > 2 \sigma(I)$ ]                      | 0.0309                 |
| w $R_2$ (all data)                               | 0.0867                 |
| Goodness of Fit                                  | 0.971                  |

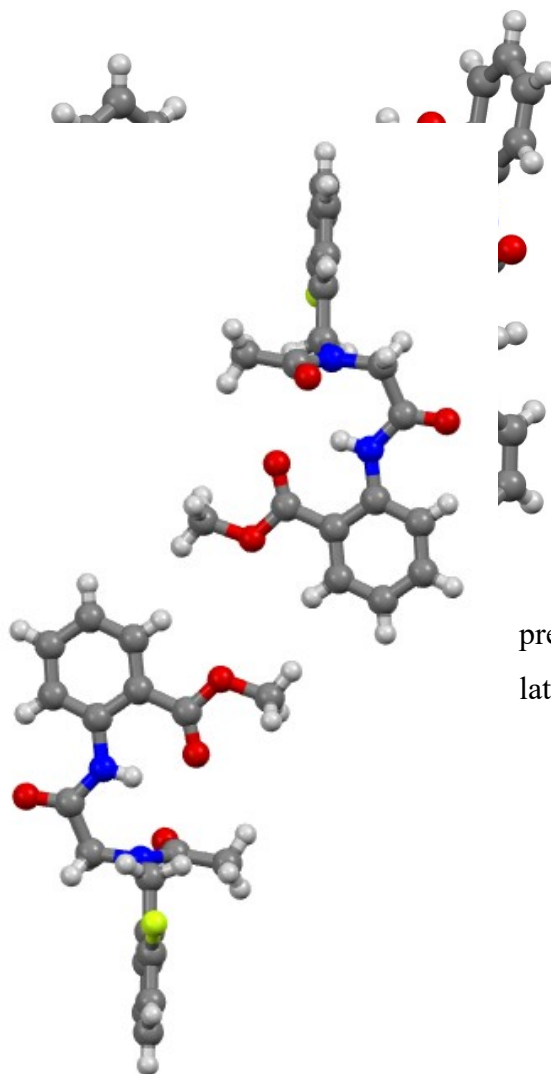

**Figure S38.** The observed in the

predominant structure was lattice of Peptoid **1-H**.

*Supporting Information*

**Figure S39.** The predominant structure was observed in the lattice of Peptoid **1-F**.

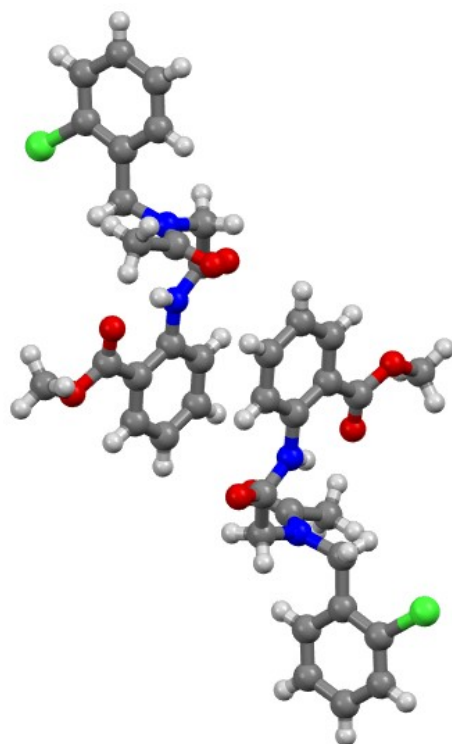



*Supporting Information*

**Figure S40.** The predominant structure was observed in the lattice of Peptoid **1-Cl**.

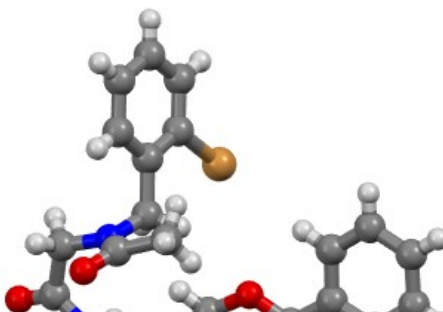

**Figure S41.** The predominant structure observed in the lattice of

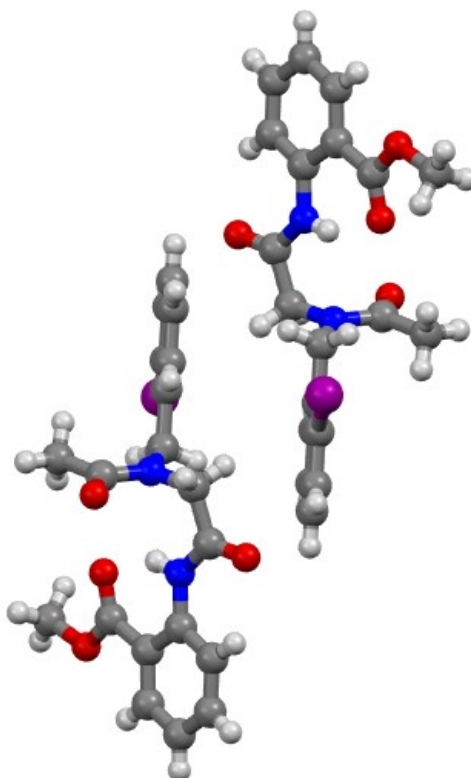

predominant structure Peptoid **1-Br**.

**Figure S42.** The predominant structure is observed in the lattice of Peptoid **1-I**.

## 8. Computational Details

**Table S11.** Comparison of dihedral angles observed from the X-ray Crystallography and Optimized structures of **1-F**, **1-Cl**, **1-Br** and **1-I**.

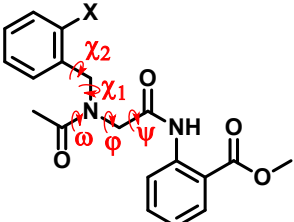

| Comp.       | Method    | $\omega$<br>(°) | $\phi$<br>(°) | $\psi$<br>(°) | $\chi_1$<br>(°) | $\chi_2$<br>(°) |
|-------------|-----------|-----------------|---------------|---------------|-----------------|-----------------|
| <b>1-H</b>  |           | -176.24         | -89.01        | 3.13          | -84.67          |                 |
| <b>1-F</b>  | Crystal   | -176.8          | -94.6         | 12.9          | 87.0            | -171.4          |
|             | Optimized | -177.6          | -101.1        | 10.8          | 86.8            | -175.5          |
| <b>1-Cl</b> | Crystal   | -175.5          | -95.4         | 15.3          | 86.8            | -171.1          |
|             | Optimized | -177.9          | -100.9        | 10.7          | 87.7            | -177.7          |
| <b>1-Br</b> | Crystal   | -176.2          | -95.3         | 15.8          | 88.5            | 173.6           |

Supporting Information

|            |           |        |        |       |       |        |
|------------|-----------|--------|--------|-------|-------|--------|
|            | Optimized | -178.0 | -100.7 | 10.3  | 88.3  | -178.1 |
| <b>1-I</b> | Crystal   | 178.0  | 87.4   | -2.7  | -91.9 | -165.8 |
|            | Optimized | 178.1  | 100.7  | -10.2 | -88.5 | 178.7  |

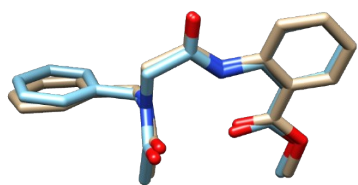

**1-H**  
RMSD: 0.30 Å

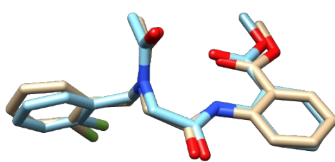

**1-F**  
RMSD: 0.35 Å

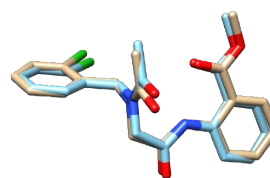

**1-Cl**  
RMSD: 0.31 Å

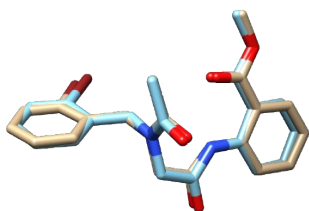

**1-Br**  
RMSD: 0.29 Å

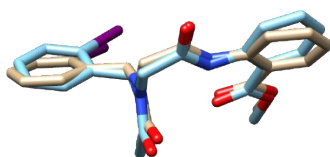

**1-I**  
RMSD: 0.45 Å

**Figure S43.** Overlay diagram for structural similarity of X-ray crystal structure and DFT optimised structure. All non-hydrogen atoms were used to calculate the RMSD.

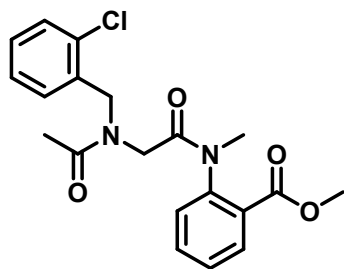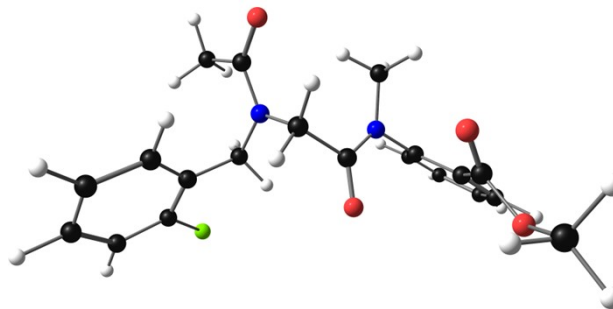

$$\text{NBO } E^2 (n_{\text{O}} \rightarrow \sigma^*_{\text{C-H}}) = 0.24 \text{ kcal/mol}$$

**Figure S44.** Chemdraw and Optimised structure of **1-Cl-Me**.

*Supporting Information*

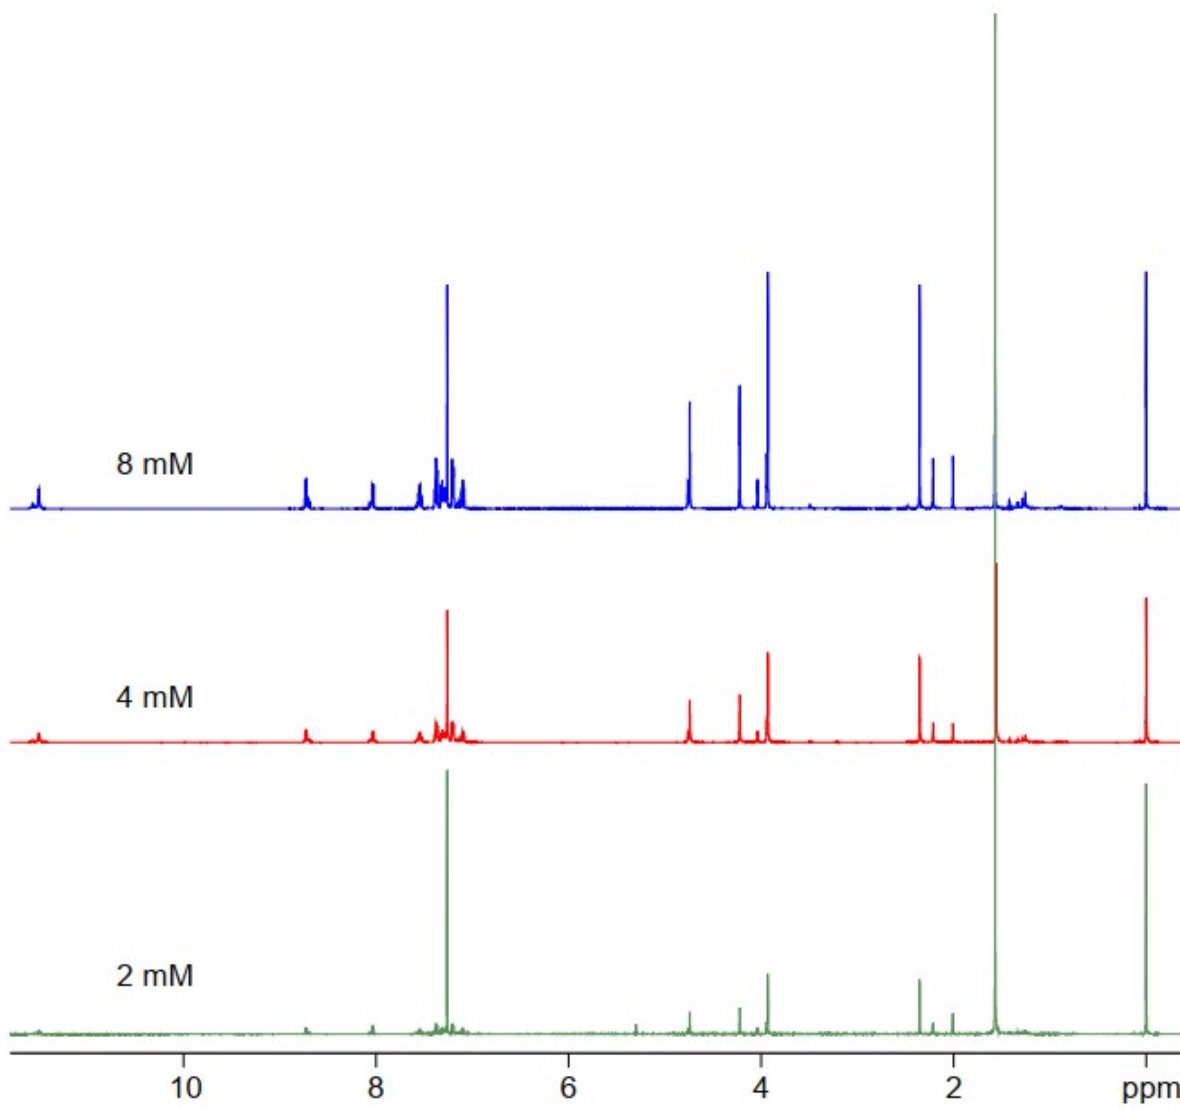

**Figure S45.** 1D  $^1\text{H}$  Overlay of 1-H at varying concentrations.

*Supporting Information*

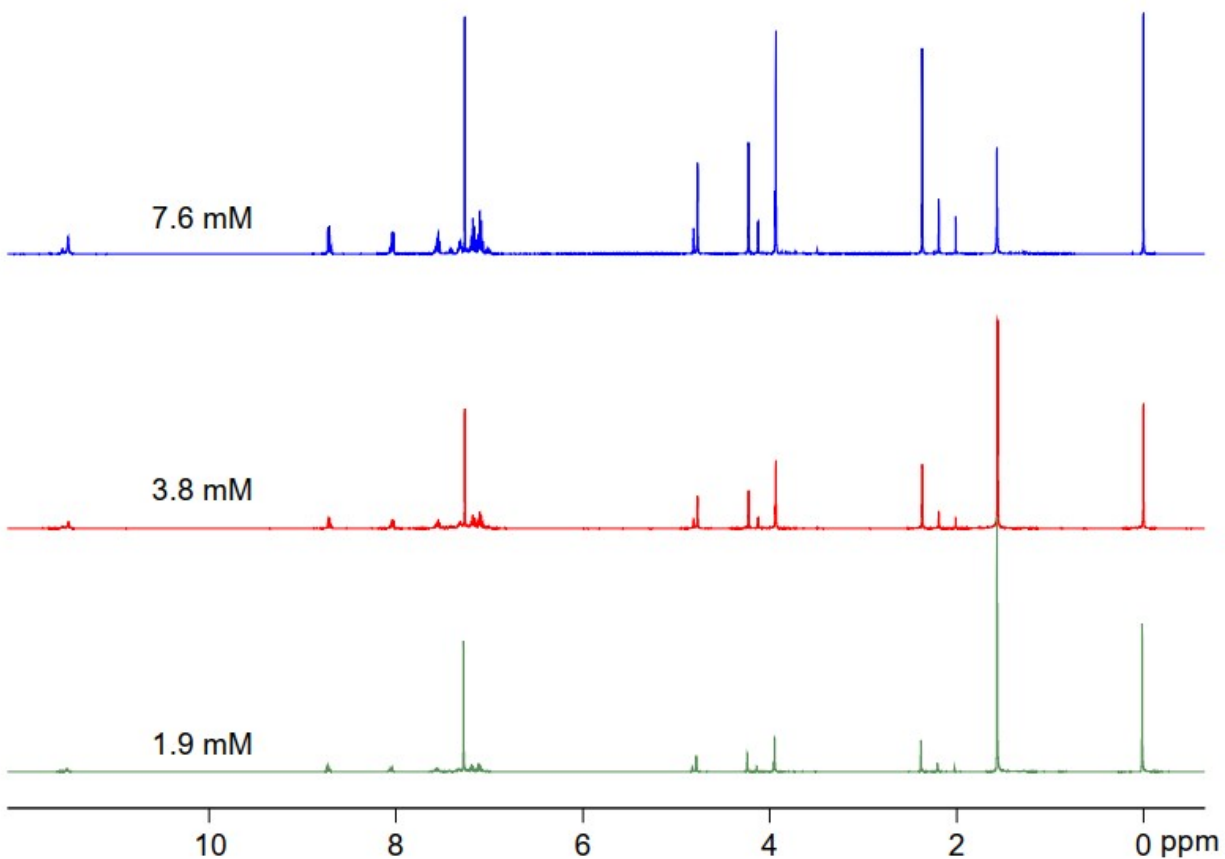

**Figure S46.** 1D  $^1\text{H}$  Overlay of **1-F** at varying concentrations.

**9. Optimized Cartesian coordinates, number of imaginary frequencies and total energy (E in a.u.) of the optimised structures**

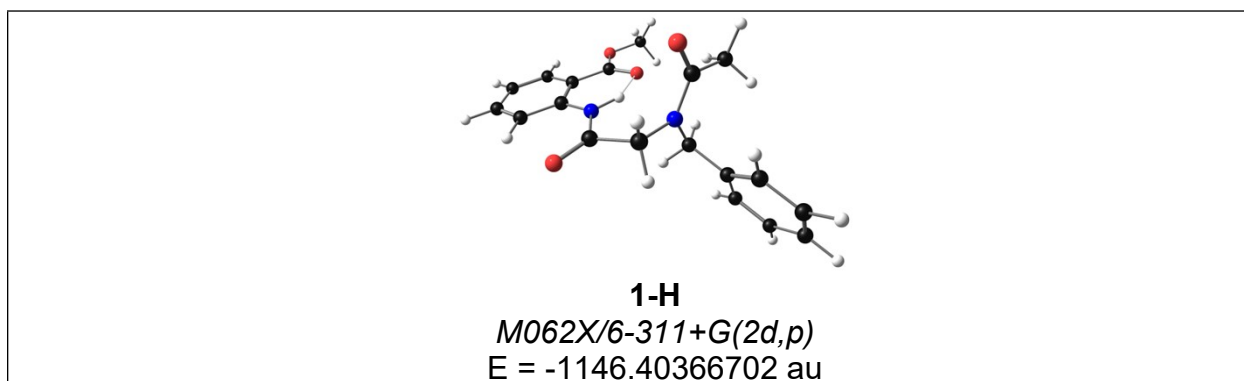

Supporting Information

| -ve frequency = nil |           |           |           |
|---------------------|-----------|-----------|-----------|
| 6                   | 5.481275  | -0.418549 | 0.020938  |
| 1                   | 6.159356  | -0.733951 | 0.803950  |
| 6                   | 5.968986  | -0.118453 | -1.241468 |
| 1                   | 7.028339  | -0.197623 | -1.449488 |
| 6                   | 5.088529  | 0.281599  | -2.240937 |
| 1                   | 5.460539  | 0.514584  | -3.230774 |
| 6                   | 3.732576  | 0.378673  | -1.972578 |
| 1                   | 3.047358  | 0.686719  | -2.755628 |
| 6                   | 3.235885  | 0.082233  | -0.704579 |
| 6                   | 4.119798  | -0.318175 | 0.289240  |
| 1                   | 3.746712  | -0.556733 | 1.278617  |
| 6                   | 1.746260  | 0.223923  | -0.451195 |
| 1                   | 1.446824  | 1.266755  | -0.561467 |
| 1                   | 1.197545  | -0.324630 | -1.222989 |
| 6                   | 1.236964  | 0.509956  | 1.971322  |
| 6                   | 1.624020  | 1.962989  | 1.822771  |
| 1                   | 0.864012  | 2.484749  | 1.237543  |
| 1                   | 2.588319  | 2.076164  | 1.324910  |
| 1                   | 1.668255  | 2.391925  | 2.819419  |
| 6                   | 1.004830  | -1.681413 | 0.938868  |
| 1                   | 1.092529  | -1.991417 | 1.979842  |
| 1                   | 1.715220  | -2.259299 | 0.343999  |
| 6                   | -0.397497 | -2.079669 | 0.471971  |
| 6                   | -2.556128 | -1.004295 | -0.152487 |
| 6                   | -3.196753 | 0.237176  | -0.372320 |
| 6                   | -4.535913 | 0.257077  | -0.770331 |
| 1                   | -5.013173 | 1.212835  | -0.931836 |
| 6                   | -5.243093 | -0.913257 | -0.958318 |
| 1                   | -6.278851 | -0.880285 | -1.267886 |
| 6                   | -4.604934 | -2.129520 | -0.742312 |
| 1                   | -5.146761 | -3.056658 | -0.883219 |
| 6                   | -3.281793 | -2.185056 | -0.343970 |
| 1                   | -2.793319 | -3.130712 | -0.174272 |
| 6                   | -2.479244 | 1.523181  | -0.198034 |
| 6                   | -2.620075 | 3.854933  | -0.237036 |
| 1                   | -2.229446 | 3.952926  | 0.774597  |
| 1                   | -3.390515 | 4.596373  | -0.424667 |
| 1                   | -1.803947 | 3.959232  | -0.950305 |
| 7                   | 1.303857  | -0.269171 | 0.838878  |
| 7                   | -1.226869 | -1.015650 | 0.255768  |
| 1                   | -0.822573 | -0.099147 | 0.410249  |
| 8                   | -3.259170 | 2.588064  | -0.398563 |
| 8                   | -1.304720 | 1.649802  | 0.091814  |
| 8                   | -0.683478 | -3.247144 | 0.329251  |
| 8                   | 0.870179  | 0.047010  | 3.032449  |

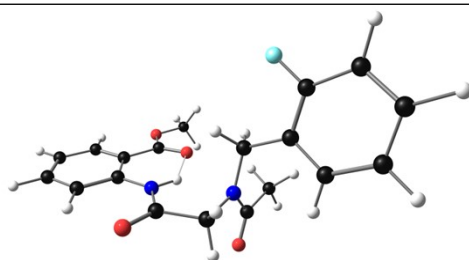

1-F

M062X/6-311+G(2d,p)

E = -1245.64884780 au

-ve frequency = nil

|   |           |           |          |
|---|-----------|-----------|----------|
| 6 | -3.969849 | -0.547640 | 0.461904 |
|---|-----------|-----------|----------|

Supporting Information

|   |           |           |           |
|---|-----------|-----------|-----------|
| 1 | -3.561567 | -0.964128 | 1.375474  |
| 6 | -5.335643 | -0.623587 | 0.212185  |
| 1 | -5.987215 | -1.099886 | 0.932726  |
| 6 | -5.860827 | -0.092134 | -0.956417 |
| 1 | -6.923142 | -0.150353 | -1.154198 |
| 6 | -5.022123 | 0.518494  | -1.881134 |
| 1 | -5.393503 | 0.944514  | -2.803621 |
| 6 | -3.673872 | 0.576525  | -1.602986 |
| 6 | -3.110444 | 0.056919  | -0.447264 |
| 6 | -1.615416 | 0.178749  | -0.236395 |
| 1 | -1.093677 | -0.248002 | -1.097853 |
| 1 | -1.322825 | 1.228891  | -0.214681 |
| 6 | -0.802639 | -1.894721 | 0.839276  |
| 1 | -1.515941 | -2.399534 | 0.184277  |
| 1 | -0.851954 | -2.355681 | 1.825359  |
| 6 | 0.593714  | -2.181594 | 0.280827  |
| 6 | -1.061195 | 0.114883  | 2.190858  |
| 6 | -1.476329 | 1.565714  | 2.262883  |
| 1 | -0.742964 | 2.181690  | 1.738553  |
| 1 | -1.499738 | 1.846625  | 3.311534  |
| 1 | -2.456299 | 1.729003  | 1.811723  |
| 6 | 2.701088  | -0.965851 | -0.252123 |
| 6 | 3.450378  | -2.086248 | -0.626219 |
| 1 | 2.995984  | -3.061723 | -0.565704 |
| 6 | 4.753211  | -1.934400 | -1.064643 |
| 1 | 5.314555  | -2.816141 | -1.348211 |
| 6 | 5.346538  | -0.679423 | -1.142456 |
| 1 | 6.366703  | -0.571278 | -1.484928 |
| 6 | 4.614976  | 0.431939  | -0.774941 |
| 1 | 5.057307  | 1.416220  | -0.828005 |
| 6 | 3.295546  | 0.314744  | -0.330712 |
| 6 | 2.548864  | 1.541766  | 0.038620  |
| 6 | 2.608845  | 3.866044  | 0.266406  |
| 1 | 3.340449  | 4.654793  | 0.121151  |
| 1 | 2.280688  | 3.831324  | 1.304046  |
| 1 | 1.745909  | 4.017928  | -0.380060 |
| 7 | 1.390531  | -1.075560 | 0.201170  |
| 1 | 0.971480  | -0.202455 | 0.500153  |
| 7 | -1.137863 | -0.491592 | 0.956805  |
| 8 | 3.278470  | 2.653014  | -0.080092 |
| 8 | 1.392082  | 1.585930  | 0.412552  |
| 8 | 0.900170  | -3.307540 | -0.040849 |
| 8 | -0.665044 | -0.491341 | 3.165164  |
| 9 | -2.849697 | 1.167408  | -2.490422 |

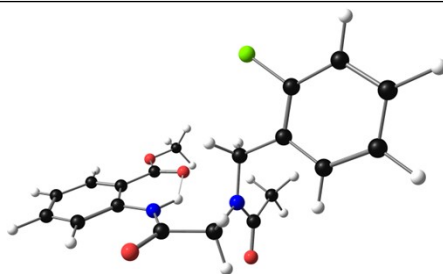

1-Cl

M062X/6-311+G(2d,p)

E = -1606.00821394 au

-ve frequency = nil

|   |           |           |          |
|---|-----------|-----------|----------|
| 6 | -3.800996 | -0.896096 | 0.490724 |
| 1 | -3.331366 | -1.530634 | 1.232968 |
| 6 | -5.173617 | -0.963782 | 0.291910 |

Supporting Information

|    |           |           |           |
|----|-----------|-----------|-----------|
| 1  | -5.767661 | -1.652414 | 0.878390  |
| 6  | -5.778671 | -0.151252 | -0.655055 |
| 1  | -6.847730 | -0.197882 | -0.816465 |
| 6  | -5.009603 | 0.729582  | -1.402317 |
| 1  | -5.458631 | 1.374713  | -2.145475 |
| 6  | -3.642939 | 0.781234  | -1.189818 |
| 6  | -3.008217 | -0.023163 | -0.247302 |
| 6  | -1.508896 | 0.070681  | -0.045599 |
| 1  | -1.006236 | -0.117712 | -0.999040 |
| 1  | -1.231909 | 1.089848  | 0.226439  |
| 6  | -0.609888 | -2.178475 | 0.459580  |
| 1  | -1.326239 | -2.530253 | -0.285922 |
| 1  | -0.616374 | -2.871798 | 1.300201  |
| 6  | 0.777343  | -2.266851 | -0.182408 |
| 6  | -0.885963 | -0.579091 | 2.275661  |
| 6  | -1.334874 | 0.794639  | 2.715481  |
| 1  | -0.632072 | 1.543892  | 2.345392  |
| 1  | -1.335852 | 0.805628  | 3.801311  |
| 1  | -2.330646 | 1.034790  | 2.339590  |
| 6  | 2.827938  | -0.878464 | -0.448397 |
| 6  | 3.601967  | -1.845384 | -1.098271 |
| 1  | 3.183504  | -2.824979 | -1.262158 |
| 6  | 4.883332  | -1.539988 | -1.519403 |
| 1  | 5.464583  | -2.304775 | -2.019616 |
| 6  | 5.430497  | -0.279246 | -1.308861 |
| 1  | 6.434284  | -0.050611 | -1.640318 |
| 6  | 4.674158  | 0.681356  | -0.668109 |
| 1  | 5.080434  | 1.667373  | -0.494888 |
| 6  | 3.375322  | 0.407340  | -0.232460 |
| 6  | 2.600240  | 1.478767  | 0.438877  |
| 6  | 2.583718  | 3.685601  | 1.205194  |
| 1  | 3.278314  | 4.519642  | 1.224500  |
| 1  | 2.302706  | 3.394898  | 2.216204  |
| 1  | 1.688249  | 3.943332  | 0.641860  |
| 7  | 1.537785  | -1.147023 | -0.002819 |
| 1  | 1.101494  | -0.389943 | 0.510717  |
| 7  | -0.984002 | -0.862162 | 0.931159  |
| 8  | 3.282616  | 2.619118  | 0.561481  |
| 8  | 1.459395  | 1.381288  | 0.849863  |
| 8  | 1.107622  | -3.266622 | -0.779425 |
| 8  | -0.446334 | -1.395598 | 3.058991  |
| 17 | -2.691580 | 1.899485  | -2.138583 |

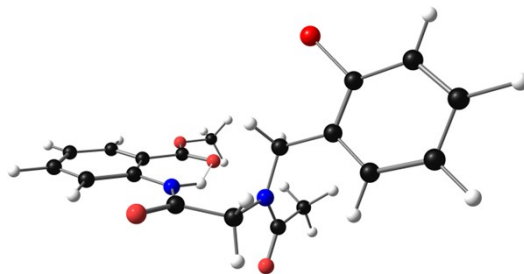

**1-Br**

*M062X/6-311+G(2d,p)*

$E = -3719.97475282 \text{ au}$

-ve frequency = nil

|   |           |           |           |
|---|-----------|-----------|-----------|
| 6 | -3.453632 | -1.535145 | 0.371776  |
| 1 | -2.898098 | -2.351209 | 0.818399  |
| 6 | -4.828660 | -1.641185 | 0.213273  |
| 1 | -5.338175 | -2.540303 | 0.534452  |
| 6 | -5.543849 | -0.597957 | -0.354561 |



Supporting Information

|    |           |           |           |
|----|-----------|-----------|-----------|
| 1  | -6.615976 | -0.671149 | -0.482596 |
| 6  | -4.881338 | 0.551317  | -0.762714 |
| 1  | -5.421845 | 1.376283  | -1.206549 |
| 6  | -3.509655 | 0.636897  | -0.596717 |
| 6  | -2.765086 | -0.394343 | -0.031156 |
| 6  | -1.264004 | -0.266839 | 0.141403  |
| 1  | -0.807109 | -0.069057 | -0.832970 |
| 1  | -1.032291 | 0.608950  | 0.748574  |
| 6  | -0.194595 | -2.470215 | -0.215372 |
| 1  | -0.925429 | -2.592059 | -1.017665 |
| 1  | -0.109952 | -3.414246 | 0.322130  |
| 6  | 1.158988  | -2.213770 | -0.883915 |
| 6  | -0.472486 | -1.643101 | 2.058550  |
| 6  | -0.984157 | -0.554019 | 2.971857  |
| 1  | -0.353220 | 0.331604  | 2.872559  |
| 1  | -0.925185 | -0.927076 | 3.989932  |
| 1  | -2.012668 | -0.277048 | 2.735388  |
| 6  | 3.090533  | -0.652164 | -0.703306 |
| 6  | 3.896304  | -1.268130 | -1.666448 |
| 1  | 3.541717  | -2.165387 | -2.147020 |
| 6  | 5.127630  | -0.727269 | -1.989107 |
| 1  | 5.735333  | -1.222084 | -2.736658 |
| 6  | 5.592219  | 0.428266  | -1.371138 |
| 1  | 6.557529  | 0.842294  | -1.628949 |
| 6  | 4.803563  | 1.043350  | -0.419802 |
| 1  | 5.145812  | 1.942601  | 0.071605  |
| 6  | 3.553571  | 0.525356  | -0.072022 |
| 6  | 2.739732  | 1.231916  | 0.946784  |
| 6  | 2.595559  | 3.045047  | 2.412767  |
| 1  | 3.220719  | 3.888521  | 2.688720  |
| 1  | 2.403338  | 2.409482  | 3.275734  |
| 1  | 1.648446  | 3.387065  | 1.998459  |
| 7  | 1.849356  | -1.167130 | -0.343523 |
| 1  | 1.391723  | -0.674081 | 0.414589  |
| 7  | -0.628893 | -1.440824 | 0.704897  |
| 8  | 3.335725  | 2.325817  | 1.425331  |
| 8  | 1.638257  | 0.893981  | 1.337519  |
| 8  | 1.524334  | -2.911991 | -1.802637 |
| 8  | 0.063206  | -2.644939 | 2.486104  |
| 35 | -2.634397 | 2.230902  | -1.166263 |

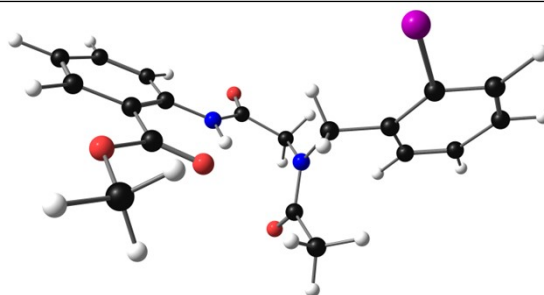

1-I

M062X/6-311+G(2d,p)

E = -1157.14248537 au

-ve frequency = nil

|   |           |          |          |
|---|-----------|----------|----------|
| 6 | -3.080638 | 2.081055 | 0.221531 |
| 1 | -2.444161 | 2.907678 | 0.514079 |
| 6 | -4.444791 | 2.283272 | 0.068469 |
| 1 | -4.864600 | 3.266156 | 0.238807 |

Supporting Information

|    |           |           |           |
|----|-----------|-----------|-----------|
| 6  | -5.262608 | 1.227102  | -0.300775 |
| 1  | -6.328238 | 1.371617  | -0.423285 |
| 6  | -4.712027 | -0.029066 | -0.514839 |
| 1  | -5.343674 | -0.859115 | -0.801156 |
| 6  | -3.347139 | -0.215684 | -0.359357 |
| 6  | -2.504364 | 0.830678  | 0.009761  |
| 6  | -1.011695 | 0.618253  | 0.182572  |
| 1  | -0.829910 | -0.163050 | 0.921579  |
| 1  | -0.594499 | 0.232400  | -0.752736 |
| 6  | -0.641087 | 1.330562  | 2.924539  |
| 1  | -0.526286 | 1.854354  | 3.868763  |
| 1  | -0.086945 | 0.390427  | 2.961024  |
| 1  | -1.694360 | 1.106883  | 2.747910  |
| 6  | -0.066886 | 2.213997  | 1.842011  |
| 6  | 0.219261  | 2.641434  | -0.538795 |
| 1  | 0.394384  | 3.648422  | -0.161235 |
| 1  | -0.519543 | 2.695479  | -1.341279 |
| 6  | 1.529246  | 2.167563  | -1.174539 |
| 6  | 3.323910  | 0.487440  | -0.777468 |
| 6  | 3.693061  | -0.625666 | 0.012498  |
| 6  | 4.881983  | -1.302738 | -0.270289 |
| 1  | 5.152599  | -2.150475 | 0.342483  |
| 6  | 5.700131  | -0.906336 | -1.308980 |
| 1  | 6.617374  | -1.441234 | -1.514587 |
| 6  | 5.327724  | 0.187233  | -2.082538 |
| 1  | 5.959803  | 0.511244  | -2.900132 |
| 6  | 4.158826  | 0.881139  | -1.828245 |
| 1  | 3.875593  | 1.729310  | -2.429920 |
| 6  | 2.843096  | -1.099813 | 1.131496  |
| 6  | 2.562426  | -2.671457 | 2.836861  |
| 1  | 2.460029  | -1.907611 | 3.606049  |
| 1  | 3.108327  | -3.529081 | 3.217545  |
| 1  | 1.573982  | -2.967457 | 2.488825  |
| 7  | -0.273729 | 1.812429  | 0.540457  |
| 7  | 2.143861  | 1.163035  | -0.483423 |
| 8  | 0.557770  | 3.223224  | 2.096169  |
| 8  | 1.792744  | -0.600654 | 1.488554  |
| 8  | 3.341068  | -2.173753 | 1.747630  |
| 8  | 1.927250  | 2.678074  | -2.197253 |
| 53 | -2.577874 | -2.150351 | -0.695358 |
| 1  | 1.665308  | 0.835440  | 0.347682  |

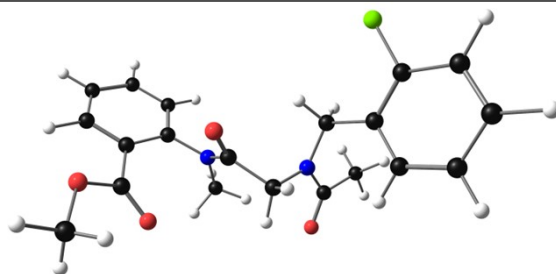

**1-CI-Me**  
*M062X/6-311+G(2d,p)*  
 E = -1645.28799191 au  
 -ve frequency = nil

|   |           |           |           |
|---|-----------|-----------|-----------|
| 6 | -3.668881 | -1.159442 | -0.590359 |
| 1 | -3.121450 | -1.992004 | -0.163902 |
| 6 | -4.766953 | -1.406130 | -1.403414 |
| 1 | -5.065310 | -2.426233 | -1.606971 |

## Supporting Information

|    |           |           |           |
|----|-----------|-----------|-----------|
| 6  | -5.476005 | -0.348184 | -1.952217 |
| 1  | -6.332264 | -0.531638 | -2.588038 |
| 6  | -5.086918 | 0.956121  | -1.683818 |
| 1  | -5.625406 | 1.798325  | -2.097166 |
| 6  | -3.989227 | 1.181082  | -0.870882 |
| 6  | -3.255847 | 0.139281  | -0.309844 |
| 6  | -2.062847 | 0.437729  | 0.578704  |
| 1  | -1.350161 | 1.048936  | 0.018886  |
| 1  | -2.382590 | 1.048904  | 1.423030  |
| 6  | -0.368679 | -1.297965 | 0.146502  |
| 1  | -0.808140 | -1.450400 | -0.841518 |
| 1  | -0.032273 | -2.253496 | 0.542939  |
| 6  | 0.792497  | -0.333058 | -0.075399 |
| 6  | -1.798169 | -1.481016 | 2.124152  |
| 6  | -2.936103 | -0.902860 | 2.936358  |
| 1  | -2.624786 | 0.019680  | 3.429493  |
| 1  | -3.205125 | -1.637464 | 3.689209  |
| 1  | -3.801975 | -0.678888 | 2.311504  |
| 6  | 2.783339  | 0.714111  | 0.731864  |
| 6  | 2.938018  | 1.883027  | 1.461003  |
| 1  | 2.168542  | 2.155543  | 2.172962  |
| 6  | 4.049581  | 2.691999  | 1.269573  |
| 1  | 4.159769  | 3.600362  | 1.848136  |
| 6  | 5.004827  | 2.344114  | 0.325974  |
| 1  | 5.868226  | 2.976090  | 0.164174  |
| 6  | 4.846609  | 1.184545  | -0.418275 |
| 1  | 5.578524  | 0.907664  | -1.164977 |
| 6  | 3.749734  | 0.354401  | -0.211846 |
| 6  | 3.628601  | -0.921882 | -0.976265 |
| 6  | 4.130370  | -2.031760 | -2.961616 |
| 1  | 4.645447  | -1.806700 | -3.890496 |
| 1  | 3.086409  | -2.277966 | -3.149199 |
| 1  | 4.608004  | -2.862648 | -2.444459 |
| 7  | 1.630914  | -0.094683 | 0.977242  |
| 7  | -1.365544 | -0.743064 | 1.052699  |
| 8  | 4.214949  | -0.843358 | -2.174251 |
| 8  | 3.098941  | -1.923245 | -0.567976 |
| 8  | 0.917601  | 0.226595  | -1.147694 |
| 8  | -1.280165 | -2.540664 | 2.425376  |
| 17 | -3.523854 | 2.831860  | -0.537102 |
| 6  | 1.722162  | -0.961493 | 2.150703  |
| 1  | 2.016613  | -0.359322 | 3.009650  |
| 1  | 0.766458  | -1.428480 | 2.368466  |
| 1  | 2.472183  | -1.737989 | 1.980373  |

## 10. References

1. Frisch, M. J.; Trucks, G. W.; Schlegel, H. B.; Scuseria, G. E.; Robb, M. A.; Cheeseman, J. R.; Scalmani, G.; Barone, V.; Mennucci, B.; Petersson, G. A.; Nakatsuji, H.; Caricato, M.; Li, X.; Hratchian, H. P.; Izmaylov, A. F.; Bloino, J.; Zheng, G.; Sonnenberg, J. L.; Hada, M.; Ehara, M.; Toyota, K.; Fukuda, R.; Hasegawa, J.; Ishida, M.; Nakajima, T.; Honda, Y.; Kitao, O.; Nakai, H.; Vreven, T.; Montgomery, J. A. Jr.; Peralta, J. E.; Ogliaro, F.; Bearpark, M.; Heyd, J. J.; Brothers, E.; Kudin, K. N.; Staroverov, V. N.; Kobayashi, R.; Normand, J.; Raghavachari, K.; Rendell, A.; Burant, J. C.; Iyengar, S. S.; Tomasi, J.; Cossi,

## *Supporting Information*

M.; Rega, N.; Millam, J. M.; Klene, M.; Knox, J. E.; Cross, J. B.; Bakken, V.; Adamo, C.; Jaramillo, J.; Gomperts, R.; Stratmann, R. E.; Yazyev, O.; Austin, A. J.; Cammi, R.; Pomelli, C.; Ochterski, J. W.; Martin, R. L.; Morokuma, K.; Zakrzewski, V. G.; Voth, G. A.; Salvador, P.; Dannenberg, J. J.; Dapprich, S.; Daniels, A. D.; Farkas, Ö.; Foresman, J. B.; Ortiz, J. V.; Cioslowski J.; Fox, D. J. *Gaussian 09* (Gaussian, Inc., Wallingford CT, **2016**).

2. Glendening, E. D.; Reed, A. E.; Carpenter J. E.; Weinhold, F.; NBO Version 3.1.
